# Supplementary material for: A protein interaction atlas for the nuclear receptors: properties and quality of a hub-based dimerisation network
Source: Springer Nature journal article supplement (doi:10.1186/1752-0509-1-34), 2007-07-31

Levels of Confidence

- Level1
- Level2
- Level3
- Level4

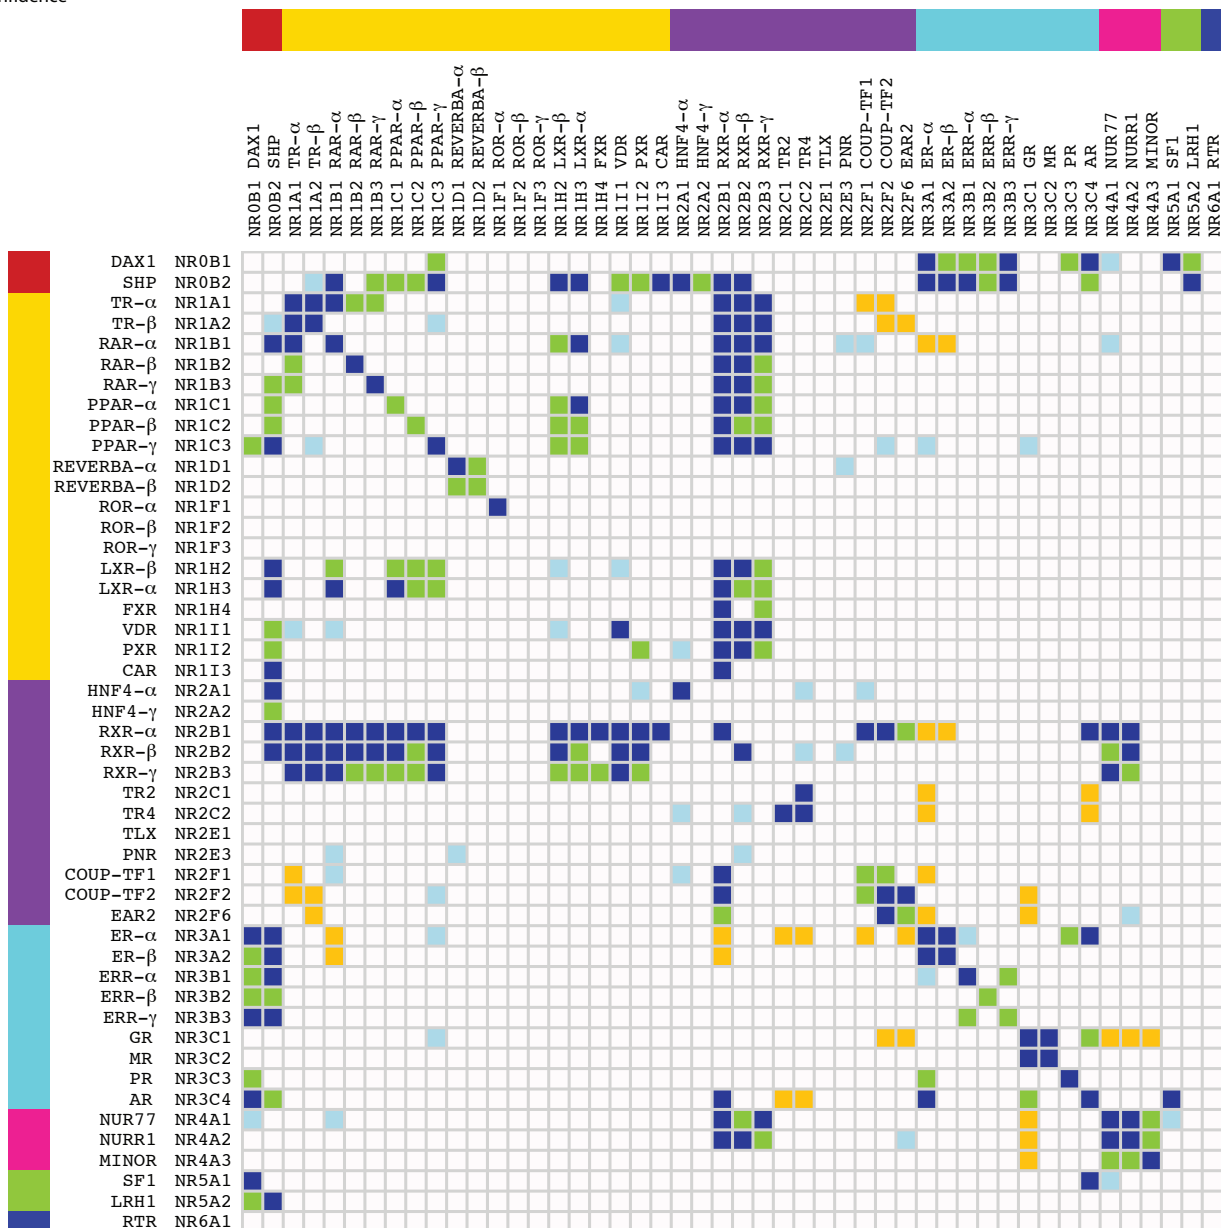

Supplement: 12918_2007_34_MOESM4_ESM.pdf [file 12918_2007_34_MOESM4_ESM.pdf]
