# Supplementary material for: A protein interaction atlas for the nuclear receptors: properties and quality of a hub-based dimerisation network
Source: BMC Syst Biol. 2007 Jul 31;1:34. doi: 10.1186/1752-0509-1-34 (PMC1971058; doi:10.1186/1752-0509-1-34)
Supplement: Additional file 1 — NR Interactions. It contains in 6 worksheets i)the Nomenclature and synonyms of NRs, ii) the protein-protein interactions, their source, the level of confidence, in how many tissues they are co-expressed, iii) the same as previous worksheet, but each interaction mentioned only once, not in both directions, iv) the predicted protein-protein interactions and in how many tissues they are expressed, v) the analysis of distribution of connectivity for the NR protein interaction network, vi) the protein-DNA interactions. [file 1752-0509-1-34-S1.xls]

## Sheet: synonyms
Name (nomenclature/NuclearDB)	Name (trivial/preferred)	SWISSPROT ID	SWISSPROT AC	EntrezGene ID	Locus tag	Locuslink ID	Chromosomal Location	Description	Description	Description	Synonyms
NR0B1	DAX1	DAX1_HUMAN	(P51843)	190	HGNC:7960	190	Xp21.3-p21.2	adrenal hypoplasia protein			AHCH	AHC	AHX	DAX-1
NR0B2	SHP	SHP_HUMAN	(Q15466)	8431	HGNC:7961	8431	1p36.1	short heterodimer partner	small heterodimer partner		SHP1	SHP-1
NR1A1	TR-alpha	THA_HUMAN	(P10827)	7067	HGNC:11796	7067	17q11.2	thyroid hormone receptor, alpha	erythroblastic leukemia viral (v-erb-a) oncogene homolog, avian		THRA	c-erbA-1	AR7	EAR7	ERBA	ERBA1	THRA1	THRA2	THRA3	EAR-7.1	EAR-7.2	ERB-T-1	ERBA-ALPHA	TR-ALPHA-1
NR1A2	TR-beta	THB1_HUMAN	(P10828)	7068	HGNC:11799	7068	3p24.3	thyroid hormone receptor, beta	avian erythroblastic leukemia viral (v-erb-a) oncogene homolog 2		THRB	c-erbA-2	THRB	GRTH	THR1	ERBA2	THRB1	THRB2	ERBA-BETA
NR1B1	RAR-alpha	RRA_HUMAN	(P10276)	5914	HGNC:9864	5914	17q21	retinoic acid receptor, alpha			RARA	RAR	PML-RAR	NPM1	NPM
NR1B2	RAR-beta	RRB_HUMAN	(P10826)	5915	HGNC:9865	5915	3p24	retinoic acid receptor, beta			Hap	RAR-epsilon	RARB	RRB2
NR1B3	RAR-gamma	RRG1_HUMAN	(P13631)	5916	HGNC:9866	5916	12q13	retinoic acid receptor, gamma			RARD	RARG	RARC
NR1C1	PPAR-alpha	PPAR_HUMAN	(Q07869)	5465	HGNC:9232	5465	22q12-q13.1	peroxisome proliferative activated receptor, alpha			PPARA	PPAR	hPPAR	hPPAR<alpha>	PPARa
NR1C2	PPAR-beta	PPAS_HUMAN	(Q03181)	5467	HGNC:9235	5467	6p21.2-p21.1	peroxisome proliferative activated receptor, beta	peroxisome proliferative activated receptor, delta		FAAR	NUC1	PPAR-delta	NUCI	NUCII	PPARD	PPARB
NR1C3	PPAR-gamma	PPAT_HUMAN	(P37231)	5468	HGNC:9236	5468	3p25	peroxisome proliferative activated receptor, gamma			PPARG	PPARG1	PPARG2	HUMPPARG
NR1D1	Rev-ErbA-alpha	NRD1_HUMAN	(P20393)	9572	HGNC:7962	9572	17q11.2		thyroid hormone receptor, alpha-like		EAR1	EAR1A	Rev-ErbAalpha	THRAL	HREV	THRA1
NR1D2	Rev-ErbA-beta	NRD2_HUMAN	(Q14995)	9975	HGNC:7963	9975	3p24.1	Rev-erb-beta			BD73;	EAR1-beta	HZF2	RVR	EAR-1r
NR1F1	ROR-alpha	RORA_HUMAN	(P35398)	6095	HGNC:10258	6095	15q21-q22	RAR-related orphan receptor A	retinoic acid receptor-related orphan receptor alpha		RZR-alpha	RORA	ROR1	ROR2	ROR3	RZRA
NR1F2	ROR-beta	RORB_HUMAN	(Q92753)	6096	HGNC:10259	6096	9q22	RAR-related orphan receptor B	retinoic acid-binding receptor beta		RZR-beta	RORB	RZRB	bA133M9.1
NR1F3	ROR-gamma	RORG_HUMAN	(P51449)	6097	HGNC:10260	6097	1q21	RAR-related orphan receptor gamma	retinoic acid-binding receptor gamma		TOR	RORC	RORG	RZRG
NR1H2	LXR-beta	NRH2_HUMAN	(P55055)	7376	HGNC:7965	7376	19q13.3-19q13.3	ubiquitously-expressed nuclear receptor			NER	OR-1	RIP15	UR	LXRB	UNR	NER-1
NR1H3	LXR-alpha	NRH3_HUMAN	(Q13133)	10062	HGNC:7966	10062	11p11.2	liver X receptor, alpha			LXR	RLD1	LXRA
NR1H4	FXR	NRH4_HUMAN	(Q96RI1)	9971	HGNC:7967	9971	12q23.3				BAR	HRR1	RIP14
NR1I1	VDR	VDR_HUMAN	(P11473)	7421	HGNC:12679	7421	12q12-q14	vitamin D (1,25- dihydroxyvitamin D3) receptor			HL-60 VDR
NR1I2	PXR	PXR_HUMAN	(O75469)	8856	HGNC:7968	8856	3q12-q13.3	pregnane X receptor			ONR1	PAR	SXR	PXR.1	PXR.2	xOR6	BXR	SAR	PARq
NR1I3	CAR	NRI3_HUMAN	(Q14994)	9970	HGNC:7969	9970	1q23.1	constitutive androstane receptor-beta			CAR-alpha	CAR-beta	CAR1	CAR2	MB67
NR2A1	HNF4-alpha	HN4A_HUMAN	(P41235)	3172	HGNC:5024	3172	20q12-q13.1	hepatocyte nuclear factor 4, alpha	transcription factor-14		TCF14	TCF
NR2A2	HNF4-gamma	HN4G_HUMAN	(Q14541)	3174	HGNC:5026	3174	8q21.11	hepatocyte nuclear factor 4, gamma			HNF4G
NR2B1	RXR-alpha	RXRA_HUMAN	(P19793)	6256	HGNC:10477	6256	9q34.3	retinoid X receptor, alpha			RXRA
NR2B2	RXR-beta	RXRB_HUMAN	(P28702)	6257	HGNC:10478	6257	6p21.3	retinoid X receptor, beta	MHC class I promoter binding protein		H-2RIIBP	RCoR-1	DAUDI6
NR2B3	RXR-gamma	RXRG_HUMAN	(P48443)	6258	HGNC:10479	6258	1q22-q23	retinoid X receptor, gamma			RXRG	RXRC
NR2C1	TR2	TR2_HUMAN	(P13056)	7181	HGNC:7971	7181	12q23.1				TR2-11	xDOR2	aDOR1
NR2C2	TR4	TR4_HUMAN	(P49116)	7182	HGNC:7972	7182	3p25				TAK1	TR2R1
NR2E1	TLX	NR21_HUMAN	(Q9Y466)	7101	HGNC:7973	7101	6q21	tailless	tailless homolog		TLL	XTLL	T1x
NR2E3	PNR	NR23_HUMAN	(Q9Y5X4)	10002	HGNC:7974	10002	15q22.32	photoreceptor-specific nuclear receptor	retina-specific nuclear receptor		ESCS
NR2F1	COUP-TF1	COT1_HUMAN	(P10589)	7025	HGNC:7975	7025	5q14	chicken ovalbumin upstream promoter 1			COUPTFA	EAR3	SVP44	COUP-TFI	TFCOUP1	ERBAL3	TCFCOUP1
NR2F2	COUP-TF2	COT2_HUMAN	(P24468)	7026	HGNC:7976	7026	15q26	chicken ovalbumin upstream promoter 2	ADP-ribosylation factor related protein 1		ARP1;	COUPTFB	SVP40	COUP-TFII
NR2F6	EAR2	EAR2_HUMAN	(P10588)	2063	HGNC:7977	2063	19p13.1	Orphan nuclear receptor EAR-2			ERBAL2
NR3A1	ER-alpha	ESR1_HUMAN	(P03372)	2099	HGNC:3467	2099	6q25.1	estrogen receptor 1			ESR1	ER	ESR	Era	ESRA	FAS/ER
NR3A2	ER-beta	ESR2_HUMAN	(Q92731)	2100	HGNC:3468	2100	14q	estrogen receptor 2			ESR2	ESTRB	Erb	ESRB	ESR-BETA
NR3B1	ERR-alpha	ERR1_HUMAN	(P11474)	2101	HGNC:3471	2101	11q13	estrogen-related receptor alpha	estrogen receptor-like 1		ERR1	ESRRA	ESRL1	ERRA
NR3B2	ERR-beta	ERR2_HUMAN	(O95718)	2103	HGNC:3473	2103	14q24.3	steroid hormone receptor ERR2	estrogen receptor-like 2		ERR2	ESRRB	ESRL2
NR3B3	ERR-gamma	ERR3_HUMAN	(O75454)	2104	HGNC:3474	2104	1q41	estrogen-related receptor gamma			ERR3	ESRRG	ERRG2
NR3C1	GR	GCR_HUMAN	(P04150)	2908	HGNC:7978	2908	5q31	glucocorticoid receptor			GCR	GRL
NR3C2	MR	MCR_HUMAN	(P08235)	4306	HGNC:7979	4306	4q31.1	mineralocorticoid receptor	aldosterone receptor		MCR	MRL
NR3C3	PR	PRGR_HUMAN	(P06401)	5241	HGNC:8910	5241	11q22-q23	progesterone receptor			PGR
NR3C4	AR	ANDR_HUMAN	(P10275)	367	HGNC:644	367	Xq11.2-q12	androgen receptor	dihydrotestosterone receptor		KD	AIS	TFM	DHTR	SBMA	SMAX1	HUMARA
NR4A1	Nur77	NR41_HUMAN	(P22736)	3164	HGNC:7980	3164	12q13	growth factor-inducible nuclear protein N10	early response protein NAK1		N10	NAK1	NGFIB	TIS1	TR3	HMR	GFRP1	NP10
NR4A2	Nurr1	NR42_HUMAN	(P43354)	4929	HGNC:7981	4929	2q22-q23	nur related protein-1	intermediate-early receptor protein	T-cell nuclear receptor NOT	HZF3	NOT	RNR1	TINOR	TINUR	TR3b
NR4A3	MINOR	NR43_HUMAN	(Q92570)	8013	HGNC:7982	8013	9q22	neuron derived orphan receptor	mitogen induced nuclear orphan receptor		CHN	NOR1	TEC	CSMF
NR5A1	SF-1	STF1_HUMAN	(Q13285)	2516	HGNC:7983	2516	9q33	fushi tarazu factor			FTZ-F1	ELP	AD4BP	FTZ1
NR5A2	LRH-1	NR52_HUMAN	(O00482)	2494	HGNC:7984	2494	1q32.1	fetoprotein-alpha 1 (AFP) transcription factor	CYP7A promoter-binding factor		CPF	FFLR	FTF	PHR	xFF1rA	xFF1rB	PHR1	B1F	B1F2	FTZ-F1beta	B1F3
NR6A1	RTR	NR61_HUMAN	(Q15406)	2649	HGNC:7985	2649	9q33-q34.1	germ cell nuclear factor	retinoic acid receptor-related testis-associated receptor		GCNF1	GCNF

## Sheet: interactions_&_expression
Interactor A phylogenetic group	Interactor A nomenclature name	Interactor A common name	Interactor B phylogenetic group	Interactor B nomenclature name	Interactor B common name	Amoutzias	HPRD	Koegl_tm	Koegl_Y2H	Vidal_Y2H	dimer recorded by literature (d1) or by homology (d2)	Homodimer	Papers from text mining supporting the interaction	Level of confidence	Number of human tissues that both interactors are present	Number of mouse tissues that both interactors are present
NR0B	NR0B1	DAX1	NR1C	NR1C3	PPAR_g				1					L2	1	0
NR0B	NR0B1	DAX1	NR3B	NR3B3	ERR_g	1			1				1	L1	0	0
NR0B	NR0B2	SHP	NR1A	NR1A2	TR_b	1							1	L4	0	0
NR0B	NR0B2	SHP	NR1B	NR1B1	RAR_a		1			1				L1	3	0
NR0B	NR0B2	SHP	NR1B	NR1B3	RAR_g				1					L2	0	0
NR0B	NR0B2	SHP	NR1C	NR1C1	PPAR_a	1		1					1	L2	3	0
NR0B	NR0B2	SHP	NR1C	NR1C2	PPAR_b				1					L2	0	0
NR0B	NR0B2	SHP	NR1C	NR1C3	PPAR_g		1			1				L1	2	0
NR0B	NR0B2	SHP	NR1H	NR1H2	LXR_b	1	1			1			1	L1	2	0
NR0B	NR0B2	SHP	NR1H	NR1H3	LXR_a	1	1			1			1	L1	3	0
NR0B	NR0B2	SHP	NR1I	NR1I1	VDR				1					L2	2	0
NR0B	NR0B2	SHP	NR1I	NR1I2	PXR	1							1	L2	3	0
NR0B	NR0B2	SHP	NR1I	NR1I3	CAR	1	1	1					3	L1	1	0
NR0B	NR0B2	SHP	NR2A	NR2A1	HNF4_a	1		1	1				4	L1	3	0
NR0B	NR0B2	SHP	NR2A	NR2A2	HNF4_g				1					L2	3	0
NR0B	NR0B2	SHP	NR2B	NR2B1	RXR_a	1	1	1		1			2	L1	3	0
NR0B	NR0B2	SHP	NR2B	NR2B2	RXR_b		1			1				L1	3	0
NR0B	NR0B2	SHP	NR3A	NR3A1	ER_a	1	1	1		1			4	L1	1	0
NR0B	NR0B2	SHP	NR3A	NR3A2	ER_b	1	1	1					4	L1	0	0
NR0B	NR0B2	SHP	NR3B	NR3B1	ERR_a	1			1				1	L1	3	0
NR0B	NR0B2	SHP	NR3B	NR3B2	ERR_b	1							1	L2	0	0
NR0B	NR0B2	SHP	NR3B	NR3B3	ERR_g	1							3	L1	2	0
NR0B	NR0B2	SHP	NR3C	NR3C4	AR	1	1						1	L2	0	0
NR0B	NR0B2	SHP	NR5A	NR5A2	LRH1	1	1	1					6	L1	3	0
NR1A	NR1A1	TR_a	NR1A	NR1A2	TR_b			1			d1		4	L1	0	0
NR1A	NR1A2	TR_b	NR0B	NR0B2	SHP	1							1	L4	0	0
NR1A	NR1A2	TR_b	NR1A	NR1A1	TR_a			1			d1		4	L1	0	0
NR1A	NR1A2	TR_b	NR1A	NR1A2	TR_b	1		1			d1	Homodimer	27	L1	0	0
NR1A	NR1A2	TR_b	NR1C	NR1C3	PPAR_g	1					d1		1	L4	0	0
NR1A	NR1A2	TR_b	NR2B	NR2B1	RXR_a	1		1	1		d1		22	L1	0	0
NR1A	NR1A2	TR_b	NR2B	NR2B2	RXR_b	1		1	1		d1		9	L1	0	0
NR1A	NR1A2	TR_b	NR2B	NR2B3	RXR_g	1	1	1	1		d1		4	L1	0	0
NR1A	NR1A2	TR_b	NR2F	NR2F2	COUP-TF2			1			d1		1	L3	0	0
NR1A	NR1A2	TR_b	NR2F	NR2F6	EAR2	1	1	1			d2		1	L3	0	0
NR1B	NR1B1	RAR_a	NR0B	NR0B2	SHP		1			1	-			L1	3	0
NR1B	NR1B3	RAR_g	NR0B	NR0B2	SHP				1		-			L2	0	0
NR1C	NR1C1	PPAR_a	NR0B	NR0B2	SHP	1		1					1	L2	3	0
NR1C	NR1C2	PPAR_b	NR0B	NR0B2	SHP				1					L2	0	0
NR1C	NR1C3	PPAR_g	NR0B	NR0B1	DAX1				1					L2	1	0
NR1C	NR1C3	PPAR_g	NR0B	NR0B2	SHP		1			1				L1	2	0
NR1C	NR1C3	PPAR_g	NR1A	NR1A2	TR_b	1					d1		1	L4	0	0
NR1H	NR1H2	LXR_b	NR0B	NR0B2	SHP	1	1			1			1	L1	2	0
NR1H	NR1H3	LXR_a	NR0B	NR0B2	SHP	1	1			1			1	L1	3	0
NR1I	NR1I1	VDR	NR0B	NR0B2	SHP				1					L2	2	0
NR1I	NR1I2	PXR	NR0B	NR0B2	SHP	1							1	L2	3	0
NR1I	NR1I2	PXR	NR1I	NR1I2	PXR					1	d2	Homodimer		L2	7	0
NR1I	NR1I2	PXR	NR2A	NR2A1	HNF4_a	1							1	L4	7	0
NR1I	NR1I2	PXR	NR2B	NR2B1	RXR_a	1	1	1	1	1	d1		9	L1	7	0
NR1I	NR1I2	PXR	NR2B	NR2B2	RXR_b		1		1	1	d2			L1	7	0
NR1I	NR1I2	PXR	NR2B	NR2B3	RXR_g				1		d2			L2	0	0
NR1I	NR1I3	CAR	NR0B	NR0B2	SHP	1	1	1					3	L1	1	0
NR1I	NR1I3	CAR	NR2B	NR2B1	RXR_a	1	1	1			d1		7	L1	1	0
NR2A	NR2A1	HNF4_a	NR0B	NR0B2	SHP	1		1	1				4	L1	3	0
NR2A	NR2A1	HNF4_a	NR1I	NR1I2	PXR	1							1	L4	7	0
NR2A	NR2A1	HNF4_a	NR2C	NR2C2	TR4	1	1						1	L4	18	0
NR2A	NR2A1	HNF4_a	NR2F	NR2F1	COUP-TF1		1							L4	11	0
NR2A	NR2A2	HNF4_g	NR0B	NR0B2	SHP				1					L2	3	0
NR2B	NR2B1	RXR_a	NR0B	NR0B2	SHP	1	1	1		1			2	L1	3	0
NR2B	NR2B1	RXR_a	NR1A	NR1A2	TR_b	1		1	1		d1		22	L1	0	0
NR2B	NR2B1	RXR_a	NR1I	NR1I2	PXR	1	1	1	1	1	d1		9	L1	7	0
NR2B	NR2B1	RXR_a	NR1I	NR1I3	CAR	1	1	1			d1		7	L1	1	0
NR2B	NR2B2	RXR_b	NR0B	NR0B2	SHP		1			1				L1	3	0
NR2B	NR2B2	RXR_b	NR1A	NR1A2	TR_b	1		1	1		d1		9	L1	0	0
NR2B	NR2B2	RXR_b	NR1I	NR1I2	PXR		1		1	1	d2			L1	7	0
NR2B	NR2B2	RXR_b	NR2C	NR2C2	TR4				1					L4	61	0
NR2B	NR2B3	RXR_g	NR1A	NR1A2	TR_b	1	1	1	1		d1		4	L1	0	0
NR2B	NR2B3	RXR_g	NR1I	NR1I2	PXR				1		d2			L2	0	0
NR2C	NR2C1	TR2	NR2C	NR2C2	TR4		1	1			d1		1(2)	L1	61	0
NR2C	NR2C1	TR2	NR3A	NR3A1	ER_a		1							L3	18	0
NR2C	NR2C1	TR2	NR3C	NR3C4	AR	1	1						1	L3	1	0
NR2C	NR2C2	TR4	NR2A	NR2A1	HNF4_a	1	1						1	L4	18	0
NR2C	NR2C2	TR4	NR2B	NR2B2	RXR_b				1					L4	61	0
NR2C	NR2C2	TR4	NR2C	NR2C1	TR2		1	1			d1		1(2)	L1	61	0
NR2C	NR2C2	TR4	NR2C	NR2C2	TR4			1			d1	Homodimer	3	L1	61	0
NR2C	NR2C2	TR4	NR3A	NR3A1	ER_a		1							L3	18	0
NR2C	NR2C2	TR4	NR3C	NR3C4	AR	1	1	1					1	L3	1	0
NR2F	NR2F1	COUP-TF1	NR2A	NR2A1	HNF4_a		1							L4	11	0
NR2F	NR2F2	COUP-TF2	NR1A	NR1A2	TR_b			1			d1		1	L3	0	0
NR2F	NR2F6	EAR2	NR1A	NR1A2	TR_b	1	1	1			d2		1	L3	0	0
NR3A	NR3A1	ER_a	NR0B	NR0B2	SHP	1	1	1		1			4	L1	1	0
NR3A	NR3A1	ER_a	NR2C	NR2C1	TR2		1							L3	18	0
NR3A	NR3A1	ER_a	NR2C	NR2C2	TR4		1							L3	18	0
NR3A	NR3A2	ER_b	NR0B	NR0B2	SHP	1	1	1					4	L1	0	0
NR3B	NR3B1	ERR_a	NR0B	NR0B2	SHP	1			1				1	L1	3	0
NR3B	NR3B2	ERR_b	NR0B	NR0B2	SHP	1							1	L2	0	0
NR3B	NR3B3	ERR_g	NR0B	NR0B1	DAX1	1			1				1	L1	0	0
NR3B	NR3B3	ERR_g	NR0B	NR0B2	SHP	1							3	L1	2	0
NR3C	NR3C4	AR	NR0B	NR0B2	SHP	1	1						1	L2	0	0
NR3C	NR3C4	AR	NR2C	NR2C1	TR2	1	1						1	L3	1	0
NR3C	NR3C4	AR	NR2C	NR2C2	TR4	1	1	1					1	L3	1	0
NR5A	NR5A2	LRH1	NR0B	NR0B2	SHP	1	1	1					6	L1	3	0
NR0B	NR0B1	DAX1	NR3A	NR3A1	ER_a	1		1					2	L1	1	1
NR0B	NR0B1	DAX1	NR3A	NR3A2	ER_b	1		1					1	L2	0	1
NR0B	NR0B1	DAX1	NR3B	NR3B2	ERR_b	1							1	L2	0	1
NR0B	NR0B1	DAX1	NR3C	NR3C3	PR	1							1	L2	0	1
NR0B	NR0B1	DAX1	NR4A	NR4A1	NUR77	1							1	L4	3	1
NR0B	NR0B1	DAX1	NR5A	NR5A2	LRH1	1							1	L2	1	1
NR1B	NR1B1	RAR_a	NR2E	NR2E3	PNR		1				d1			L4	0	1
NR1B	NR1B1	RAR_a	NR3A	NR3A2	ER_b			1					1	L3	0	1
NR1D	NR1D1	REV-ERBA_a	NR2E	NR2E3	PNR	1							1	L4	0	1
NR1H	NR1H4	FXR	NR2B	NR2B3	RXR_g				1		d2			L2	0	1
NR2B	NR2B1	RXR_a	NR3A	NR3A2	ER_b			1					1	L3	0	1
NR2B	NR2B2	RXR_b	NR2E	NR2E3	PNR		1				d1			L4	0	1
NR2B	NR2B3	RXR_g	NR1H	NR1H4	FXR				1		d2			L2	0	1
NR2E	NR2E3	PNR	NR1B	NR1B1	RAR_a		1				d1			L4	0	1
NR2E	NR2E3	PNR	NR1D	NR1D1	REV-ERBA_a	1							1	L4	0	1
NR2E	NR2E3	PNR	NR2B	NR2B2	RXR_b		1				d1			L4	0	1
NR3A	NR3A1	ER_a	NR0B	NR0B1	DAX1	1		1					2	L1	1	1
NR3A	NR3A1	ER_a	NR3A	NR3A2	ER_b	1	1	1			d1		20	L1	0	1
NR3A	NR3A2	ER_b	NR0B	NR0B1	DAX1	1		1					1	L2	0	1
NR3A	NR3A2	ER_b	NR1B	NR1B1	RAR_a			1					1	L3	0	1
NR3A	NR3A2	ER_b	NR2B	NR2B1	RXR_a			1					1	L3	0	1
NR3A	NR3A2	ER_b	NR3A	NR3A1	ER_a	1	1	1			d1		20	L1	0	1
NR3A	NR3A2	ER_b	NR3A	NR3A2	ER_b			1			d1	Homodimer	10	L1	0	1
NR3B	NR3B2	ERR_b	NR0B	NR0B1	DAX1	1							1	L2	0	1
NR3C	NR3C3	PR	NR0B	NR0B1	DAX1	1							1	L2	0	1
NR4A	NR4A1	NUR77	NR0B	NR0B1	DAX1	1							1	L4	3	1
NR5A	NR5A2	LRH1	NR0B	NR0B1	DAX1	1							1	L2	1	1
NR0B	NR0B1	DAX1	NR3B	NR3B1	ERR_a				1					L2	2	2
NR0B	NR0B1	DAX1	NR3C	NR3C4	AR	1	1						2	L1	0	2
NR0B	NR0B1	DAX1	NR5A	NR5A1	SF1	1		1					11	L1	0	2
NR1C	NR1C3	PPAR_g	NR2B	NR2B3	RXR_g	1	1	1		1	d1		2	L1	2	2
NR1C	NR1C3	PPAR_g	NR3A	NR3A1	ER_a	1							1	L4	6	2
NR1I	NR1I1	VDR	NR2B	NR2B3	RXR_g	1		1	1		d1		3	L1	0	2
NR2B	NR2B3	RXR_g	NR1C	NR1C3	PPAR_g	1	1	1		1	d1		2	L1	2	2
NR2B	NR2B3	RXR_g	NR1I	NR1I1	VDR	1		1	1		d1		3	L1	0	2
NR3A	NR3A1	ER_a	NR1C	NR1C3	PPAR_g	1							1	L4	6	2
NR3B	NR3B1	ERR_a	NR0B	NR0B1	DAX1				1					L2	2	2
NR3C	NR3C4	AR	NR0B	NR0B1	DAX1	1	1						2	L1	0	2
NR4A	NR4A1	NUR77	NR5A	NR5A1	SF1			1					1	L4	0	2
NR5A	NR5A1	SF1	NR0B	NR0B1	DAX1	1		1					11	L1	0	2
NR5A	NR5A1	SF1	NR4A	NR4A1	NUR77			1					1	L4	0	2
NR1C	NR1C1	PPAR_a	NR2B	NR2B3	RXR_g	1					d1		1	L2	10	3
NR1C	NR1C3	PPAR_g	NR1H	NR1H3	LXR_a	1							1	L2	12	3
NR1H	NR1H3	LXR_a	NR1C	NR1C3	PPAR_g	1							1	L2	12	3
NR2B	NR2B3	RXR_g	NR1C	NR1C1	PPAR_a	1					d1		1	L2	10	3
NR3C	NR3C4	AR	NR5A	NR5A1	SF1	1		1					2	L1	0	3
NR5A	NR5A1	SF1	NR3C	NR3C4	AR	1		1					2	L1	0	3
NR1C	NR1C1	PPAR_a	NR1H	NR1H3	LXR_a	1	1	1		1			4	L1	21	4
NR1H	NR1H3	LXR_a	NR1C	NR1C1	PPAR_a	1	1	1		1			4	L1	21	4
NR4A	NR4A1	NUR77	NR4A	NR4A3	MINOR	1					d1		1	L2	14	4
NR4A	NR4A3	MINOR	NR4A	NR4A1	NUR77	1					d1		1	L2	14	4
NR1C	NR1C1	PPAR_a	NR1C	NR1C1	PPAR_a					1	d2	Homodimer		L2	31	5
NR1C	NR1C1	PPAR_a	NR1H	NR1H2	LXR_b	1							1	L2	29	5
NR1C	NR1C1	PPAR_a	NR2B	NR2B1	RXR_a	1	1	1		1	d1		60	L1	31	5
NR1C	NR1C1	PPAR_a	NR2B	NR2B2	RXR_b	1		1			d1		2	L1	31	5
NR1C	NR1C3	PPAR_g	NR1C	NR1C3	PPAR_g	1		1		1	d1	Homodimer	2	L1	12	5
NR1C	NR1C3	PPAR_g	NR1H	NR1H2	LXR_b	1							1	L2	11	5
NR1C	NR1C3	PPAR_g	NR2B	NR2B1	RXR_a	1	1	1		1	d1		48	L1	12	5
NR1C	NR1C3	PPAR_g	NR2B	NR2B2	RXR_b	1		1	1		d1		2	L1	12	5
NR1C	NR1C3	PPAR_g	NR2F	NR2F2	COUP-TF2	1		1					1	L4	12	5
NR1C	NR1C3	PPAR_g	NR3C	NR3C1	GR	1							1	L4	12	5
NR1H	NR1H2	LXR_b	NR1C	NR1C1	PPAR_a	1							1	L2	29	5
NR1H	NR1H2	LXR_b	NR1C	NR1C3	PPAR_g	1							1	L2	11	5
NR2B	NR2B1	RXR_a	NR1C	NR1C1	PPAR_a	1	1	1		1	d1		60	L1	31	5
NR2B	NR2B1	RXR_a	NR1C	NR1C3	PPAR_g	1	1	1		1	d1		48	L1	12	5
NR2B	NR2B2	RXR_b	NR1C	NR1C1	PPAR_a	1		1			d1		2	L1	31	5
NR2B	NR2B2	RXR_b	NR1C	NR1C3	PPAR_g	1		1	1		d1		2	L1	12	5
NR2F	NR2F1	COUP-TF1	NR3A	NR3A1	ER_a		1							L3	15	5
NR2F	NR2F2	COUP-TF2	NR1C	NR1C3	PPAR_g	1		1					1	L4	12	5
NR3A	NR3A1	ER_a	NR2F	NR2F1	COUP-TF1		1							L3	15	5
NR3A	NR3A1	ER_a	NR3C	NR3C3	PR	1							1	L2	3	5
NR3C	NR3C1	GR	NR1C	NR1C3	PPAR_g	1							1	L4	12	5
NR3C	NR3C3	PR	NR3A	NR3A1	ER_a	1							1	L2	3	5
NR4A	NR4A1	NUR77	NR4A	NR4A2	NURR1	1		1			d1		2	L1	29	5
NR4A	NR4A2	NURR1	NR4A	NR4A1	NUR77	1		1			d1		2	L1	29	5
NR4A	NR4A2	NURR1	NR4A	NR4A3	MINOR	1					d1		1	L2	25	5
NR4A	NR4A3	MINOR	NR4A	NR4A2	NURR1	1					d1		1	L2	25	5
NR2B	NR2B3	RXR_g	NR4A	NR4A1	NUR77		1			1	d1			L1	4	6
NR2B	NR2B3	RXR_g	NR4A	NR4A2	NURR1	1					d1		1	L2	23	6
NR3C	NR3C1	GR	NR4A	NR4A3	MINOR	1							1	L3	26	6
NR4A	NR4A1	NUR77	NR2B	NR2B3	RXR_g		1			1	d1			L1	4	6
NR4A	NR4A2	NURR1	NR2B	NR2B3	RXR_g	1					d1		1	L2	23	6
NR4A	NR4A3	MINOR	NR3C	NR3C1	GR	1							1	L3	26	6
NR4A	NR4A3	MINOR	NR4A	NR4A3	MINOR	1					d1	Homodimer	2	L1	26	6
NR2A	NR2A1	HNF4_a	NR2A	NR2A1	HNF4_a	1		1	1		d1	Homodimer	2	L1	18	7
NR3B	NR3B2	ERR_b	NR3B	NR3B2	ERR_b			1			d1	Homodimer	1	L2	0	7
NR1B	NR1B1	RAR_a	NR4A	NR4A1	NUR77	1		1					1	L4	29	8
NR1B	NR1B2	RAR_b	NR2B	NR2B3	RXR_g				1		d2			L2	23	8
NR2B	NR2B1	RXR_a	NR4A	NR4A1	NUR77	1		1			d1		3	L1	30	8
NR2B	NR2B2	RXR_b	NR4A	NR4A1	NUR77		1				d1			L2	30	8
NR2B	NR2B3	RXR_g	NR1B	NR1B2	RAR_b				1		d2			L2	23	8
NR3A	NR3A1	ER_a	NR3C	NR3C4	AR	1	1	1					2	L1	1	8
NR3C	NR3C1	GR	NR4A	NR4A1	NUR77	1							1	L3	30	8
NR3C	NR3C4	AR	NR3A	NR3A1	ER_a	1	1	1					2	L1	1	8
NR4A	NR4A1	NUR77	NR1B	NR1B1	RAR_a	1		1					1	L4	29	8
NR4A	NR4A1	NUR77	NR2B	NR2B1	RXR_a	1		1			d1		3	L1	30	8
NR4A	NR4A1	NUR77	NR2B	NR2B2	RXR_b		1				d1			L2	30	8
NR4A	NR4A1	NUR77	NR3C	NR3C1	GR	1							1	L3	30	8
NR4A	NR4A1	NUR77	NR4A	NR4A1	NUR77	1	1	1			d1	Homodimer	4	L1	30	8
NR1A	NR1A1	TR_a	NR1B	NR1B2	RAR_b	1					d1		1	L2	61	9
NR1A	NR1A1	TR_a	NR1I	NR1I1	VDR	1					d1		1	L4	15	9
NR1B	NR1B1	RAR_a	NR1I	NR1I1	VDR	1					d1		1	L4	15	9
NR1B	NR1B2	RAR_b	NR1A	NR1A1	TR_a	1					d1		1	L2	61	9
NR1B	NR1B2	RAR_b	NR1B	NR1B2	RAR_b	1		1			d1	Homodimer	2	L1	61	9
NR1B	NR1B2	RAR_b	NR2B	NR2B1	RXR_a	1		1			d1		17	L1	61	9
NR1B	NR1B2	RAR_b	NR2B	NR2B2	RXR_b	1	1	1	1		d1		3	L1	61	9
NR1H	NR1H2	LXR_b	NR1I	NR1I1	VDR				1					L4	14	9
NR1H	NR1H3	LXR_a	NR2B	NR2B3	RXR_g				1		d2			L2	3	9
NR1I	NR1I1	VDR	NR1A	NR1A1	TR_a	1					d1		1	L4	15	9
NR1I	NR1I1	VDR	NR1B	NR1B1	RAR_a	1					d1		1	L4	15	9
NR1I	NR1I1	VDR	NR1H	NR1H2	LXR_b				1					L4	14	9
NR1I	NR1I1	VDR	NR1I	NR1I1	VDR	1		1			d1	Homodimer	31	L1	15	9
NR1I	NR1I1	VDR	NR2B	NR2B1	RXR_a	1	1	1	1		d1		49	L1	15	9
NR1I	NR1I1	VDR	NR2B	NR2B2	RXR_b	1		1	1		d1		10	L1	15	9
NR2B	NR2B1	RXR_a	NR1B	NR1B2	RAR_b	1		1			d1		17	L1	61	9
NR2B	NR2B1	RXR_a	NR1I	NR1I1	VDR	1	1	1	1		d1		49	L1	15	9
NR2B	NR2B2	RXR_b	NR1B	NR1B2	RAR_b	1	1	1	1		d1		3	L1	61	9
NR2B	NR2B2	RXR_b	NR1I	NR1I1	VDR	1		1	1		d1		10	L1	15	9
NR2B	NR2B3	RXR_g	NR1H	NR1H3	LXR_a				1		d2			L2	3	9
NR1H	NR1H4	FXR	NR2B	NR2B1	RXR_a	1	1	1			d1		9	L1	9	10
NR2B	NR2B1	RXR_a	NR1H	NR1H4	FXR	1	1	1			d1		9	L1	9	10
NR2B	NR2B1	RXR_a	NR4A	NR4A2	NURR1	1	1		1	1	d1		1	L1	60	10
NR2B	NR2B2	RXR_b	NR4A	NR4A2	NURR1	1	1		1	1	d1		1	L1	60	10
NR2F	NR2F6	EAR2	NR4A	NR4A2	NURR1			1					1	L4	28	10
NR3A	NR3A1	ER_a	NR3B	NR3B1	ERR_a			1					1	L4	14	10
NR3B	NR3B1	ERR_a	NR3A	NR3A1	ER_a			1					1	L4	14	10
NR3C	NR3C1	GR	NR4A	NR4A2	NURR1	1							1	L3	60	10
NR4A	NR4A2	NURR1	NR2B	NR2B1	RXR_a	1	1		1	1	d1		1	L1	60	10
NR4A	NR4A2	NURR1	NR2B	NR2B2	RXR_b	1	1		1	1	d1		1	L1	60	10
NR4A	NR4A2	NURR1	NR2F	NR2F6	EAR2			1					1	L4	28	10
NR4A	NR4A2	NURR1	NR3C	NR3C1	GR	1							1	L3	60	10
NR4A	NR4A2	NURR1	NR4A	NR4A2	NURR1	1					d1	Homodimer	2	L1	60	10
NR1B	NR1B1	RAR_a	NR3A	NR3A1	ER_a	1		1					1	L3	18	11
NR2B	NR2B1	RXR_a	NR3A	NR3A1	ER_a	1		1					1	L3	18	11
NR2F	NR2F6	EAR2	NR3A	NR3A1	ER_a		1							L3	8	11
NR3A	NR3A1	ER_a	NR1B	NR1B1	RAR_a	1		1					1	L3	18	11
NR3A	NR3A1	ER_a	NR2B	NR2B1	RXR_a	1		1					1	L3	18	11
NR3A	NR3A1	ER_a	NR2F	NR2F6	EAR2		1							L3	8	11
NR3A	NR3A1	ER_a	NR3A	NR3A1	ER_a	1		1			d1	Homodimer	15	L1	18	11
NR2B	NR2B1	RXR_a	NR3C	NR3C4	AR	1							2	L1	1	12
NR3C	NR3C1	GR	NR3C	NR3C4	AR	1	1				d1		1	L2	1	12
NR3C	NR3C4	AR	NR2B	NR2B1	RXR_a	1							2	L1	1	12
NR3C	NR3C4	AR	NR3C	NR3C1	GR	1	1				d1		1	L2	1	12
NR3C	NR3C4	AR	NR3C	NR3C4	AR	1		1			d1	Homodimer	8	L1	1	12
NR3B	NR3B1	ERR_a	NR3B	NR3B3	ERR_g				1		d2			L2	16	13
NR3B	NR3B3	ERR_g	NR3B	NR3B1	ERR_a				1		d2			L2	16	13
NR3B	NR3B3	ERR_g	NR3B	NR3B3	ERR_g	1					d2	Homodimer	1	L2	32	13
NR1C	NR1C2	PPAR_b	NR1H	NR1H3	LXR_a	1							1	L2	2	15
NR1D	NR1D1	REV-ERBA_a	NR1D	NR1D2	REV-ERBA_b				1		d2			L2	31	15
NR1D	NR1D2	REV-ERBA_b	NR1D	NR1D1	REV-ERBA_a				1		d2			L2	31	15
NR1H	NR1H3	LXR_a	NR1C	NR1C2	PPAR_b	1							1	L2	2	15
NR3C	NR3C3	PR	NR3C	NR3C3	PR	1		1			d1	Homodimer	13	L1	3	15
NR1D	NR1D2	REV-ERBA_b	NR1D	NR1D2	REV-ERBA_b			1			d1	Homodimer	1	L2	61	17
NR1B	NR1B1	RAR_a	NR1H	NR1H3	LXR_a		1			1	-			L1	31	18
NR1B	NR1B3	RAR_g	NR2B	NR2B3	RXR_g				1		d2			L2	0	18
NR1H	NR1H3	LXR_a	NR1B	NR1B1	RAR_a		1			1	-			L1	31	18
NR1H	NR1H3	LXR_a	NR2B	NR2B1	RXR_a	1		1	1		d1		8	L1	33	18
NR1H	NR1H3	LXR_a	NR2B	NR2B2	RXR_b				1		d2			L2	33	18
NR2B	NR2B1	RXR_a	NR1H	NR1H3	LXR_a	1		1	1		d1		8	L1	33	18
NR2B	NR2B2	RXR_b	NR1H	NR1H3	LXR_a				1		d2			L2	33	18
NR2B	NR2B3	RXR_g	NR1B	NR1B3	RAR_g				1		d2			L2	0	18
NR1B	NR1B1	RAR_a	NR2F	NR2F1	COUP-TF1	1					d1		1	L4	23	19
NR1C	NR1C2	PPAR_b	NR2B	NR2B3	RXR_g				1		d2			L2	0	19
NR1F	NR1F1	ROR_a	NR1F	NR1F1	ROR_a	1		1		1	d1	Homodimer	2	L1	16	19
NR2B	NR2B3	RXR_g	NR1C	NR1C2	PPAR_b				1		d2			L2	0	19
NR2F	NR2F1	COUP-TF1	NR1B	NR1B1	RAR_a	1					d1		1	L4	23	19
NR2F	NR2F1	COUP-TF1	NR2F	NR2F2	COUP-TF2	1		1			d1		1	L2	47	19
NR2F	NR2F2	COUP-TF2	NR2F	NR2F1	COUP-TF1	1		1			d1		1	L2	47	19
NR1A	NR1A1	TR_a	NR2B	NR2B3	RXR_g	1		1			d1		3	L1	23	20
NR1A	NR1A1	TR_a	NR2F	NR2F1	COUP-TF1		1				d1			L3	47	20
NR2B	NR2B1	RXR_a	NR2F	NR2F1	COUP-TF1	1	1	1			d1		2	L1	47	20
NR2B	NR2B3	RXR_g	NR1A	NR1A1	TR_a	1		1			d1		3	L1	23	20
NR2F	NR2F1	COUP-TF1	NR1A	NR1A1	TR_a		1				d1			L3	47	20
NR2F	NR2F1	COUP-TF1	NR2B	NR2B1	RXR_a	1	1	1			d1		2	L1	47	20
NR2F	NR2F1	COUP-TF1	NR2F	NR2F1	COUP-TF1	1		1			d1	Homodimer	1	L2	47	20
NR1D	NR1D1	REV-ERBA_a	NR1D	NR1D1	REV-ERBA_a	1		1			d1	Homodimer	2	L1	31	21
NR1B	NR1B1	RAR_a	NR2B	NR2B3	RXR_g	1		1	1	1	d1		1	L1	4	22
NR1H	NR1H2	LXR_b	NR2B	NR2B3	RXR_g				1		d2			L2	23	22
NR2B	NR2B3	RXR_g	NR1B	NR1B1	RAR_a	1		1	1	1	d1		1	L1	4	22
NR2B	NR2B3	RXR_g	NR1H	NR1H2	LXR_b				1		d2			L2	23	22
NR1A	NR1A1	TR_a	NR1B	NR1B3	RAR_g	1					d1		1	L2	1	29
NR1B	NR1B3	RAR_g	NR1A	NR1A1	TR_a	1					d1		1	L2	1	29
NR1B	NR1B3	RAR_g	NR1B	NR1B3	RAR_g	1		1			d1	Homodimer	2	L1	1	29
NR1B	NR1B3	RAR_g	NR2B	NR2B1	RXR_a	1	1	1	1		d1		17	L1	1	29
NR1B	NR1B3	RAR_g	NR2B	NR2B2	RXR_b	1		1	1		d1		2	L1	1	29
NR2B	NR2B1	RXR_a	NR1B	NR1B3	RAR_g	1	1	1	1		d1		17	L1	1	29
NR2B	NR2B2	RXR_b	NR1B	NR1B3	RAR_g	1		1	1		d1		2	L1	1	29
NR1A	NR1A1	TR_a	NR2F	NR2F2	COUP-TF2	1		1			d1		1	L3	61	31
NR2F	NR2F2	COUP-TF2	NR1A	NR1A1	TR_a	1		1			d1		1	L3	61	31
NR2F	NR2F2	COUP-TF2	NR2F	NR2F6	EAR2	1	1	1	1		d1		1	L1	29	32
NR2F	NR2F6	EAR2	NR2F	NR2F2	COUP-TF2	1	1	1	1		d1		1	L1	29	32
NR1C	NR1C2	PPAR_b	NR1C	NR1C2	PPAR_b					1	d2	Homodimer		L2	2	33
NR1C	NR1C2	PPAR_b	NR1H	NR1H2	LXR_b	1							1	L2	1	33
NR1C	NR1C2	PPAR_b	NR2B	NR2B1	RXR_a	1		1	1		d1		7	L1	2	33
NR1C	NR1C2	PPAR_b	NR2B	NR2B2	RXR_b				1		d2			L2	2	33
NR1H	NR1H2	LXR_b	NR1C	NR1C2	PPAR_b	1							1	L2	1	33
NR2B	NR2B1	RXR_a	NR1C	NR1C2	PPAR_b	1		1	1		d1		7	L1	2	33
NR2B	NR2B1	RXR_a	NR2F	NR2F2	COUP-TF2	1		1			d1		2	L1	61	33
NR2B	NR2B2	RXR_b	NR1C	NR1C2	PPAR_b				1		d2			L2	2	33
NR2F	NR2F2	COUP-TF2	NR2B	NR2B1	RXR_a	1		1			d1		2	L1	61	33
NR2F	NR2F2	COUP-TF2	NR2F	NR2F2	COUP-TF2	1		1			d1	Homodimer	4	L1	61	33
NR2F	NR2F2	COUP-TF2	NR3C	NR3C1	GR	1							1	L3	61	33
NR3C	NR3C1	GR	NR2F	NR2F2	COUP-TF2	1							1	L3	61	33
NR3C	NR3C1	GR	NR3C	NR3C2	MR	1	1	1			d1		17	L1	61	33
NR3C	NR3C2	MR	NR3C	NR3C1	GR	1	1	1			d1		17	L1	61	33
NR3C	NR3C2	MR	NR3C	NR3C2	MR	1		1			d1	Homodimer	8	L1	61	34
NR1A	NR1A1	TR_a	NR1B	NR1B1	RAR_a	1		1			d1		3	L1	35	35
NR1B	NR1B1	RAR_a	NR1A	NR1A1	TR_a	1		1			d1		3	L1	35	35
NR2F	NR2F6	EAR2	NR3C	NR3C1	GR		1							L3	29	35
NR3C	NR3C1	GR	NR2F	NR2F6	EAR2		1							L3	29	35
NR2B	NR2B1	RXR_a	NR2F	NR2F6	EAR2	1		1			d1		1	L2	29	36
NR2F	NR2F6	EAR2	NR2B	NR2B1	RXR_a	1		1			d1		1	L2	29	36
NR2F	NR2F6	EAR2	NR2F	NR2F6	EAR2	1	1	1			d1	Homodimer	1	L2	29	36
NR1A	NR1A1	TR_a	NR1A	NR1A1	TR_a	1		1			d1	Homodimer	20	L1	61	37
NR1A	NR1A1	TR_a	NR2B	NR2B1	RXR_a	1	1	1	1	1	d1		26	L1	61	37
NR1A	NR1A1	TR_a	NR2B	NR2B2	RXR_b	1	1	1		1	d1		10	L1	61	37
NR1B	NR1B1	RAR_a	NR1B	NR1B1	RAR_a	1		1			d1	Homodimer	15	L1	35	37
NR1B	NR1B1	RAR_a	NR1H	NR1H2	LXR_b				1		-			L2	33	37
NR1B	NR1B1	RAR_a	NR2B	NR2B1	RXR_a	1		1	1	1	d1		72	L1	35	37
NR1B	NR1B1	RAR_a	NR2B	NR2B2	RXR_b	1		1	1	1	d1		8	L1	35	37
NR1H	NR1H2	LXR_b	NR1B	NR1B1	RAR_a				1		-			L2	33	37
NR2B	NR2B1	RXR_a	NR1A	NR1A1	TR_a	1	1	1	1	1	d1		26	L1	61	37
NR2B	NR2B1	RXR_a	NR1B	NR1B1	RAR_a	1		1	1	1	d1		72	L1	35	37
NR2B	NR2B2	RXR_b	NR1A	NR1A1	TR_a	1	1	1		1	d1		10	L1	61	37
NR2B	NR2B2	RXR_b	NR1B	NR1B1	RAR_a	1		1	1	1	d1		8	L1	35	37
NR3B	NR3B1	ERR_a	NR3B	NR3B1	ERR_a	1		1			d1	Homodimer	2	L1	39	37
NR3C	NR3C1	GR	NR3C	NR3C1	GR	1		1		1	d1	Homodimer	16	L1	61	38
NR1H	NR1H2	LXR_b	NR1H	NR1H2	LXR_b					1		Homodimer		L4	57	39
NR1H	NR1H2	LXR_b	NR2B	NR2B1	RXR_a	1	1	1	1	1	d1		4	L1	57	39
NR1H	NR1H2	LXR_b	NR2B	NR2B2	RXR_b	1	1		1	1	d1		1	L1	57	39
NR2B	NR2B1	RXR_a	NR1H	NR1H2	LXR_b	1	1	1	1	1	d1		4	L1	57	39
NR2B	NR2B1	RXR_a	NR2B	NR2B1	RXR_a	1		1		1	d1	Homodimer	21	L1	61	39
NR2B	NR2B2	RXR_b	NR1H	NR1H2	LXR_b	1	1		1	1	d1		1	L1	57	39
NR2B	NR2B2	RXR_b	NR2B	NR2B2	RXR_b	1		1		1	d1	Homodimer	2	L1	61	39

## Sheet: interactions&expression_nr
Interactor A phylogenetic group	Interactor A nomenclature name	Interactor A common name	Interactor B phylogenetic group	Interactor B nomenclature name	Interactor B common name	Amoutzias	HPRD	Koegl_tm	Koegl_Y2H	Vidal_Y2H	dimer recorded by literature (d1) or by homology (d2)	Homodimer	Papers from text mining supporting the interaction	Level of confidence	Number of human tissues that both interactors are present	Number of mouse tissues that both interactors are present
NR0B	NR0B1	DAX1	NR1C	NR1C3	PPAR_g				1					L2	1	0
NR0B	NR0B1	DAX1	NR3A	NR3A1	ER_a	1		1					2	L1	1	1
NR0B	NR0B1	DAX1	NR3A	NR3A2	ER_b	1		1					1	L2	0	1
NR0B	NR0B1	DAX1	NR3B	NR3B1	ERR_a				1					L2	2	2
NR0B	NR0B1	DAX1	NR3B	NR3B2	ERR_b	1							1	L2	0	1
NR0B	NR0B1	DAX1	NR3B	NR3B3	ERR_g	1			1				1	L1	0	0
NR0B	NR0B1	DAX1	NR3C	NR3C3	PR	1							1	L2	0	1
NR0B	NR0B1	DAX1	NR3C	NR3C4	AR	1	1						2	L1	0	2
NR0B	NR0B1	DAX1	NR4A	NR4A1	NUR77	1							1	L4	3	1
NR0B	NR0B1	DAX1	NR5A	NR5A1	SF1	1		1					11	L1	0	2
NR0B	NR0B1	DAX1	NR5A	NR5A2	LRH1	1							1	L2	1	1
NR0B	NR0B2	SHP	NR1A	NR1A2	TR_b	1							1	L4	0	0
NR0B	NR0B2	SHP	NR1B	NR1B1	RAR_a		1			1				L1	3	0
NR0B	NR0B2	SHP	NR1B	NR1B3	RAR_g				1					L2	0	0
NR0B	NR0B2	SHP	NR1C	NR1C1	PPAR_a	1		1					1	L2	3	0
NR0B	NR0B2	SHP	NR1C	NR1C2	PPAR_b				1					L2	0	0
NR0B	NR0B2	SHP	NR1C	NR1C3	PPAR_g		1			1				L1	2	0
NR0B	NR0B2	SHP	NR1H	NR1H2	LXR_b	1	1			1			1	L1	2	0
NR0B	NR0B2	SHP	NR1H	NR1H3	LXR_a	1	1			1			1	L1	3	0
NR0B	NR0B2	SHP	NR1I	NR1I1	VDR				1					L2	2	0
NR0B	NR0B2	SHP	NR1I	NR1I2	PXR	1							1	L2	3	0
NR0B	NR0B2	SHP	NR1I	NR1I3	CAR	1	1	1					3	L1	1	0
NR0B	NR0B2	SHP	NR2A	NR2A1	HNF4_a	1		1	1				4	L1	3	0
NR0B	NR0B2	SHP	NR2A	NR2A2	HNF4_g				1					L2	3	0
NR0B	NR0B2	SHP	NR2B	NR2B1	RXR_a	1	1	1		1			2	L1	3	0
NR0B	NR0B2	SHP	NR2B	NR2B2	RXR_b		1			1				L1	3	0
NR0B	NR0B2	SHP	NR3A	NR3A1	ER_a	1	1	1		1			4	L1	1	0
NR0B	NR0B2	SHP	NR3A	NR3A2	ER_b	1	1	1					4	L1	0	0
NR0B	NR0B2	SHP	NR3B	NR3B1	ERR_a	1			1				1	L1	3	0
NR0B	NR0B2	SHP	NR3B	NR3B2	ERR_b	1							1	L2	0	0
NR0B	NR0B2	SHP	NR3B	NR3B3	ERR_g	1							3	L1	2	0
NR0B	NR0B2	SHP	NR3C	NR3C4	AR	1	1						1	L2	0	0
NR0B	NR0B2	SHP	NR5A	NR5A2	LRH1	1	1	1					6	L1	3	0
NR1A	NR1A1	TR_a	NR1A	NR1A1	TR_a	1		1			d1	Homodimer	20	L1	61	37
NR1A	NR1A1	TR_a	NR1A	NR1A2	TR_b			1			d1		4	L1	0	0
NR1A	NR1A1	TR_a	NR1B	NR1B1	RAR_a	1		1			d1		3	L1	35	35
NR1A	NR1A1	TR_a	NR1B	NR1B2	RAR_b	1					d1		1	L2	61	9
NR1A	NR1A1	TR_a	NR1B	NR1B3	RAR_g	1					d1		1	L2	1	29
NR1A	NR1A1	TR_a	NR1I	NR1I1	VDR	1					d1		1	L4	15	9
NR1A	NR1A1	TR_a	NR2B	NR2B1	RXR_a	1	1	1	1	1	d1		26	L1	61	37
NR1A	NR1A1	TR_a	NR2B	NR2B2	RXR_b	1	1	1		1	d1		10	L1	61	37
NR1A	NR1A1	TR_a	NR2B	NR2B3	RXR_g	1		1			d1		3	L1	23	20
NR1A	NR1A1	TR_a	NR2F	NR2F1	COUP-TF1		1				d1			L3	47	20
NR1A	NR1A1	TR_a	NR2F	NR2F2	COUP-TF2	1		1			d1		1	L3	61	31
NR1A	NR1A2	TR_b	NR1A	NR1A2	TR_b	1		1			d1	Homodimer	27	L1	0	0
NR1A	NR1A2	TR_b	NR1C	NR1C3	PPAR_g	1					d1		1	L4	0	0
NR1A	NR1A2	TR_b	NR2B	NR2B1	RXR_a	1		1	1		d1		22	L1	0	0
NR1A	NR1A2	TR_b	NR2B	NR2B2	RXR_b	1		1	1		d1		9	L1	0	0
NR1A	NR1A2	TR_b	NR2B	NR2B3	RXR_g	1	1	1	1		d1		4	L1	0	0
NR1A	NR1A2	TR_b	NR2F	NR2F2	COUP-TF2			1			d1		1	L3	0	0
NR1A	NR1A2	TR_b	NR2F	NR2F6	EAR2	1	1	1			d2		1	L3	0	0
NR1B	NR1B1	RAR_a	NR1B	NR1B1	RAR_a	1		1			d1	Homodimer	15	L1	35	37
NR1B	NR1B1	RAR_a	NR1H	NR1H2	LXR_b				1		-			L2	33	37
NR1B	NR1B1	RAR_a	NR1H	NR1H3	LXR_a		1			1	-			L1	31	18
NR1B	NR1B1	RAR_a	NR1I	NR1I1	VDR	1					d1		1	L4	15	9
NR1B	NR1B1	RAR_a	NR2B	NR2B1	RXR_a	1		1	1	1	d1		72	L1	35	37
NR1B	NR1B1	RAR_a	NR2B	NR2B2	RXR_b	1		1	1	1	d1		8	L1	35	37
NR1B	NR1B1	RAR_a	NR2B	NR2B3	RXR_g	1		1	1	1	d1		1	L1	4	22
NR1B	NR1B1	RAR_a	NR2E	NR2E3	PNR		1				d1			L4	0	1
NR1B	NR1B1	RAR_a	NR2F	NR2F1	COUP-TF1	1					d1		1	L4	23	19
NR1B	NR1B1	RAR_a	NR3A	NR3A1	ER_a	1		1					1	L3	18	11
NR1B	NR1B1	RAR_a	NR3A	NR3A2	ER_b			1					1	L3	0	1
NR1B	NR1B1	RAR_a	NR4A	NR4A1	NUR77	1		1					1	L4	29	8
NR1B	NR1B2	RAR_b	NR1B	NR1B2	RAR_b	1		1			d1	Homodimer	2	L1	61	9
NR1B	NR1B2	RAR_b	NR2B	NR2B1	RXR_a	1		1			d1		17	L1	61	9
NR1B	NR1B2	RAR_b	NR2B	NR2B2	RXR_b	1	1	1	1		d1		3	L1	61	9
NR1B	NR1B2	RAR_b	NR2B	NR2B3	RXR_g				1		d2			L2	23	8
NR1B	NR1B3	RAR_g	NR1B	NR1B3	RAR_g	1		1			d1	Homodimer	2	L1	1	29
NR1B	NR1B3	RAR_g	NR2B	NR2B1	RXR_a	1	1	1	1		d1		17	L1	1	29
NR1B	NR1B3	RAR_g	NR2B	NR2B2	RXR_b	1		1	1		d1		2	L1	1	29
NR1B	NR1B3	RAR_g	NR2B	NR2B3	RXR_g				1		d2			L2	0	18
NR1C	NR1C1	PPAR_a	NR1C	NR1C1	PPAR_a					1	d2	Homodimer		L2	31	5
NR1C	NR1C1	PPAR_a	NR1H	NR1H2	LXR_b	1							1	L2	29	5
NR1C	NR1C1	PPAR_a	NR1H	NR1H3	LXR_a	1	1	1		1			4	L1	21	4
NR1C	NR1C1	PPAR_a	NR2B	NR2B1	RXR_a	1	1	1		1	d1		60	L1	31	5
NR1C	NR1C1	PPAR_a	NR2B	NR2B2	RXR_b	1		1			d1		2	L1	31	5
NR1C	NR1C1	PPAR_a	NR2B	NR2B3	RXR_g	1					d1		1	L2	10	3
NR1C	NR1C2	PPAR_b	NR1C	NR1C2	PPAR_b					1	d2	Homodimer		L2	2	33
NR1C	NR1C2	PPAR_b	NR1H	NR1H2	LXR_b	1							1	L2	1	33
NR1C	NR1C2	PPAR_b	NR1H	NR1H3	LXR_a	1							1	L2	2	15
NR1C	NR1C2	PPAR_b	NR2B	NR2B1	RXR_a	1		1	1		d1		7	L1	2	33
NR1C	NR1C2	PPAR_b	NR2B	NR2B2	RXR_b				1		d2			L2	2	33
NR1C	NR1C2	PPAR_b	NR2B	NR2B3	RXR_g				1		d2			L2	0	19
NR1C	NR1C3	PPAR_g	NR1C	NR1C3	PPAR_g	1		1		1	d1	Homodimer	2	L1	12	5
NR1C	NR1C3	PPAR_g	NR1H	NR1H2	LXR_b	1							1	L2	11	5
NR1C	NR1C3	PPAR_g	NR1H	NR1H3	LXR_a	1							1	L2	12	3
NR1C	NR1C3	PPAR_g	NR2B	NR2B1	RXR_a	1	1	1		1	d1		48	L1	12	5
NR1C	NR1C3	PPAR_g	NR2B	NR2B2	RXR_b	1		1	1		d1		2	L1	12	5
NR1C	NR1C3	PPAR_g	NR2B	NR2B3	RXR_g	1	1	1		1	d1		2	L1	2	2
NR1C	NR1C3	PPAR_g	NR2F	NR2F2	COUP-TF2	1		1					1	L4	12	5
NR1C	NR1C3	PPAR_g	NR3A	NR3A1	ER_a	1							1	L4	6	2
NR1C	NR1C3	PPAR_g	NR3C	NR3C1	GR	1							1	L4	12	5
NR1D	NR1D1	REV-ERBA_a	NR1D	NR1D1	REV-ERBA_a	1		1			d1	Homodimer	2	L1	31	21
NR1D	NR1D1	REV-ERBA_a	NR1D	NR1D2	REV-ERBA_b				1		d2			L2	31	15
NR1D	NR1D1	REV-ERBA_a	NR2E	NR2E3	PNR	1							1	L4	0	1
NR1D	NR1D2	REV-ERBA_b	NR1D	NR1D2	REV-ERBA_b			1			d1	Homodimer	1	L2	61	17
NR1F	NR1F1	ROR_a	NR1F	NR1F1	ROR_a	1		1		1	d1	Homodimer	2	L1	16	19
NR1H	NR1H2	LXR_b	NR1H	NR1H2	LXR_b					1		Homodimer		L4	57	39
NR1H	NR1H2	LXR_b	NR1I	NR1I1	VDR				1					L4	14	9
NR1H	NR1H2	LXR_b	NR2B	NR2B1	RXR_a	1	1	1	1	1	d1		4	L1	57	39
NR1H	NR1H2	LXR_b	NR2B	NR2B2	RXR_b	1	1		1	1	d1		1	L1	57	39
NR1H	NR1H2	LXR_b	NR2B	NR2B3	RXR_g				1		d2			L2	23	22
NR1H	NR1H3	LXR_a	NR2B	NR2B1	RXR_a	1		1	1		d1		8	L1	33	18
NR1H	NR1H3	LXR_a	NR2B	NR2B2	RXR_b				1		d2			L2	33	18
NR1H	NR1H3	LXR_a	NR2B	NR2B3	RXR_g				1		d2			L2	3	9
NR1H	NR1H4	FXR	NR2B	NR2B1	RXR_a	1	1	1			d1		9	L1	9	10
NR1H	NR1H4	FXR	NR2B	NR2B3	RXR_g				1		d2			L2	0	1
NR1I	NR1I1	VDR	NR1I	NR1I1	VDR	1		1			d1	Homodimer	31	L1	15	9
NR1I	NR1I1	VDR	NR2B	NR2B1	RXR_a	1	1	1	1		d1		49	L1	15	9
NR1I	NR1I1	VDR	NR2B	NR2B2	RXR_b	1		1	1		d1		10	L1	15	9
NR1I	NR1I1	VDR	NR2B	NR2B3	RXR_g	1		1	1		d1		3	L1	0	2
NR1I	NR1I2	PXR	NR1I	NR1I2	PXR					1	d2	Homodimer		L2	7	0
NR1I	NR1I2	PXR	NR2A	NR2A1	HNF4_a	1							1	L4	7	0
NR1I	NR1I2	PXR	NR2B	NR2B1	RXR_a	1	1	1	1	1	d1		9	L1	7	0
NR1I	NR1I2	PXR	NR2B	NR2B2	RXR_b		1		1	1	d2			L1	7	0
NR1I	NR1I2	PXR	NR2B	NR2B3	RXR_g				1		d2			L2	0	0
NR1I	NR1I3	CAR	NR2B	NR2B1	RXR_a	1	1	1			d1		7	L1	1	0
NR2A	NR2A1	HNF4_a	NR2A	NR2A1	HNF4_a	1		1	1		d1	Homodimer	2	L1	18	7
NR2A	NR2A1	HNF4_a	NR2C	NR2C2	TR4	1	1						1	L4	18	0
NR2A	NR2A1	HNF4_a	NR2F	NR2F1	COUP-TF1		1							L4	11	0
NR2B	NR2B1	RXR_a	NR2B	NR2B1	RXR_a	1		1		1	d1	Homodimer	21	L1	61	39
NR2B	NR2B1	RXR_a	NR2F	NR2F1	COUP-TF1	1	1	1			d1		2	L1	47	20
NR2B	NR2B1	RXR_a	NR2F	NR2F2	COUP-TF2	1		1			d1		2	L1	61	33
NR2B	NR2B1	RXR_a	NR2F	NR2F6	EAR2	1		1			d1		1	L2	29	36
NR2B	NR2B1	RXR_a	NR3A	NR3A1	ER_a	1		1					1	L3	18	11
NR2B	NR2B1	RXR_a	NR3A	NR3A2	ER_b			1					1	L3	0	1
NR2B	NR2B1	RXR_a	NR3C	NR3C4	AR	1							2	L1	1	12
NR2B	NR2B1	RXR_a	NR4A	NR4A1	NUR77	1		1			d1		3	L1	30	8
NR2B	NR2B1	RXR_a	NR4A	NR4A2	NURR1	1	1		1	1	d1		1	L1	60	10
NR2B	NR2B2	RXR_b	NR2B	NR2B2	RXR_b	1		1		1	d1	Homodimer	2	L1	61	39
NR2B	NR2B2	RXR_b	NR2C	NR2C2	TR4				1					L4	61	0
NR2B	NR2B2	RXR_b	NR2E	NR2E3	PNR		1				d1			L4	0	1
NR2B	NR2B2	RXR_b	NR4A	NR4A1	NUR77		1				d1			L2	30	8
NR2B	NR2B2	RXR_b	NR4A	NR4A2	NURR1	1	1		1	1	d1		1	L1	60	10
NR2B	NR2B3	RXR_g	NR4A	NR4A1	NUR77		1			1	d1			L1	4	6
NR2B	NR2B3	RXR_g	NR4A	NR4A2	NURR1	1					d1		1	L2	23	6
NR2C	NR2C1	TR2	NR2C	NR2C2	TR4		1	1			d1		1(2)	L1	61	0
NR2C	NR2C1	TR2	NR3A	NR3A1	ER_a		1							L3	18	0
NR2C	NR2C1	TR2	NR3C	NR3C4	AR	1	1						1	L3	1	0
NR2C	NR2C2	TR4	NR2C	NR2C2	TR4			1			d1	Homodimer	3	L1	61	0
NR2C	NR2C2	TR4	NR3A	NR3A1	ER_a		1							L3	18	0
NR2C	NR2C2	TR4	NR3C	NR3C4	AR	1	1	1					1	L3	1	0
NR2F	NR2F1	COUP-TF1	NR2F	NR2F1	COUP-TF1	1		1			d1	Homodimer	1	L2	47	20
NR2F	NR2F1	COUP-TF1	NR2F	NR2F2	COUP-TF2	1		1			d1		1	L2	47	19
NR2F	NR2F1	COUP-TF1	NR3A	NR3A1	ER_a		1							L3	15	5
NR2F	NR2F2	COUP-TF2	NR2F	NR2F2	COUP-TF2	1		1			d1	Homodimer	4	L1	61	33
NR2F	NR2F2	COUP-TF2	NR2F	NR2F6	EAR2	1	1	1	1		d1		1	L1	29	32
NR2F	NR2F2	COUP-TF2	NR3C	NR3C1	GR	1							1	L3	61	33
NR2F	NR2F6	EAR2	NR2F	NR2F6	EAR2	1	1	1			d1	Homodimer	1	L2	29	36
NR2F	NR2F6	EAR2	NR3A	NR3A1	ER_a		1							L3	8	11
NR2F	NR2F6	EAR2	NR3C	NR3C1	GR		1							L3	29	35
NR2F	NR2F6	EAR2	NR4A	NR4A2	NURR1			1					1	L4	28	10
NR3A	NR3A1	ER_a	NR3A	NR3A1	ER_a	1		1			d1	Homodimer	15	L1	18	11
NR3A	NR3A1	ER_a	NR3A	NR3A2	ER_b	1	1	1			d1		20	L1	0	1
NR3A	NR3A1	ER_a	NR3B	NR3B1	ERR_a			1					1	L4	14	10
NR3A	NR3A1	ER_a	NR3C	NR3C3	PR	1							1	L2	3	5
NR3A	NR3A1	ER_a	NR3C	NR3C4	AR	1	1	1					2	L1	1	8
NR3A	NR3A2	ER_b	NR3A	NR3A2	ER_b			1			d1	Homodimer	10	L1	0	1
NR3B	NR3B1	ERR_a	NR3B	NR3B1	ERR_a	1		1			d1	Homodimer	2	L1	39	37
NR3B	NR3B1	ERR_a	NR3B	NR3B3	ERR_g				1		d2			L2	16	13
NR3B	NR3B2	ERR_b	NR3B	NR3B2	ERR_b			1			d1	Homodimer	1	L2	0	7
NR3B	NR3B3	ERR_g	NR3B	NR3B3	ERR_g	1					d2	Homodimer	1	L2	32	13
NR3C	NR3C1	GR	NR3C	NR3C1	GR	1		1		1	d1	Homodimer	16	L1	61	38
NR3C	NR3C1	GR	NR3C	NR3C2	MR	1	1	1			d1		17	L1	61	33
NR3C	NR3C1	GR	NR3C	NR3C4	AR	1	1				d1		1	L2	1	12
NR3C	NR3C1	GR	NR4A	NR4A1	NUR77	1							1	L3	30	8
NR3C	NR3C1	GR	NR4A	NR4A2	NURR1	1							1	L3	60	10
NR3C	NR3C1	GR	NR4A	NR4A3	MINOR	1							1	L3	26	6
NR3C	NR3C2	MR	NR3C	NR3C2	MR	1		1			d1	Homodimer	8	L1	61	34
NR3C	NR3C3	PR	NR3C	NR3C3	PR	1		1			d1	Homodimer	13	L1	3	15
NR3C	NR3C4	AR	NR3C	NR3C4	AR	1		1			d1	Homodimer	8	L1	1	12
NR3C	NR3C4	AR	NR5A	NR5A1	SF1	1		1					2	L1	0	3
NR4A	NR4A1	NUR77	NR4A	NR4A1	NUR77	1	1	1			d1	Homodimer	4	L1	30	8
NR4A	NR4A1	NUR77	NR4A	NR4A2	NURR1	1		1			d1		2	L1	29	5
NR4A	NR4A1	NUR77	NR4A	NR4A3	MINOR	1					d1		1	L2	14	4
NR4A	NR4A1	NUR77	NR5A	NR5A1	SF1			1					1	L4	0	2
NR4A	NR4A2	NURR1	NR4A	NR4A2	NURR1	1					d1	Homodimer	2	L1	60	10
NR4A	NR4A2	NURR1	NR4A	NR4A3	MINOR	1					d1		1	L2	25	5
NR4A	NR4A3	MINOR	NR4A	NR4A3	MINOR	1					d1	Homodimer	2	L1	26	6

## Sheet: predicted_ints
Predicted interactions (based on sequence homology)		Number of human tissues that both interactors are present	Number of mouse tissues that both interactors are present
NR3C4	NR4A1	1	3
NR3C4	NR4A2	1	2
NR3C4	NR4A3	0	1
NR3C3	NR3C4	0	5
NR3C3	NR4A1	3	5
NR3C3	NR4A2	3	8
NR3C3	NR4A3	0	4
NR3C2	NR3C3	3	13
NR3C2	NR3C4	1	11
NR3C2	NR4A1	30	8
NR3C2	NR4A2	60	10
NR3C2	NR4A3	26	5
NR3C1	NR3C3	3	15
NR3B2	NR3B3	0	5
NR3B1	NR3B2	0	7
NR3A2	NR3C1	0	1
NR3A2	NR3C2	0	1
NR3A2	NR3C3	0	1
NR3A2	NR3C4	0	1
NR3A1	NR3C1	18	11
NR3A1	NR3C2	18	10
NR2F6	NR3A2	0	1
NR2F6	NR3C2	29	34
NR2F6	NR3C3	0	14
NR2F6	NR3C4	1	12
NR2F2	NR3A1	18	11
NR2F2	NR3A2	0	1
NR2F2	NR3C2	61	31
NR2F2	NR3C3	3	14
NR2F2	NR3C4	1	12
NR2F1	NR2F6	21	20
NR2F1	NR3A2	0	1
NR2F1	NR3C1	47	20
NR2F1	NR3C2	47	19
NR2F1	NR3C3	3	11
NR2F1	NR3C4	1	5
NR2C2	NR3A2	0	0
NR2C2	NR3C1	61	0
NR2C2	NR3C2	61	0
NR2C2	NR3C3	3	0
NR2C1	NR2C1	61	0
NR2C1	NR3A2	0	0
NR2C1	NR3C1	61	0
NR2C1	NR3C2	61	0
NR2C1	NR3C3	3	0
NR2B3	NR2B3	23	22
NR2B3	NR2F1	21	14
NR2B3	NR2F2	23	21
NR2B3	NR2F6	7	20
NR2B3	NR3A1	3	8
NR2B3	NR3A2	0	0
NR2B3	NR4A3	10	3
NR2B2	NR2B3	23	22
NR2B2	NR2F1	47	20
NR2B2	NR2F2	61	33
NR2B2	NR2F6	29	36
NR2B2	NR3A1	18	11
NR2B2	NR3A2	0	1
NR2B2	NR4A3	26	6
NR2B1	NR2B2	61	39
NR2B1	NR2B3	23	22
NR2B1	NR4A3	26	6
NR1I3	NR1I3	1	0
NR1I3	NR2B2	1	0
NR1I3	NR2B3	0	0
NR1I2	NR1I3	1	0
NR1I1	NR1I2	6	0
NR1I1	NR1I3	0	0
NR1H4	NR2B2	9	10
NR1C3	NR1H4	4	2
NR1C2	NR1C3	1	5
NR1C2	NR1H4	0	10
NR1C1	NR1C2	1	5
NR1C1	NR1C3	8	2
NR1C1	NR1H4	8	2
NR1B3	NR1H2	1	29
NR1B3	NR1H3	0	12
NR1B3	NR1H4	0	6
NR1B3	NR3A1	0	11
NR1B3	NR3A2	0	1
NR1B2	NR1B3	1	9
NR1B2	NR1H2	57	9
NR1B2	NR1H3	33	6
NR1B2	NR1H4	9	1
NR1B2	NR3A1	18	3
NR1B2	NR3A2	0	0
NR1B1	NR1B2	35	9
NR1B1	NR1B3	1	28
NR1B1	NR1H4	9	10
NR1A2	NR1B1	0	0
NR1A2	NR1B2	0	0
NR1A2	NR1B3	0	0
NR1A2	NR2F1	0	0
NR1A1	NR2F6	29	35
NR0B2	NR1B2	3	0
NR0B2	NR1H4	3	0
NR0B2	NR2B3	0	0
NR0B2	NR3C1	3	0
NR0B2	NR3C2	3	0
NR0B2	NR3C3	0	0
NR0B2	NR5A1	0	0
NR0B1	NR1B1	2	2
NR0B1	NR1B2	3	1
NR0B1	NR1B3	0	2
NR0B1	NR1C1	1	0
NR0B1	NR1C2	0	1
NR0B1	NR1H2	2	2
NR0B1	NR1H3	3	1
NR0B1	NR1H4	2	1
NR0B1	NR1I1	1	0
NR0B1	NR1I2	0	0
NR0B1	NR1I3	0	0
NR0B1	NR2A1	1	0
NR0B1	NR2A2	1	0
NR0B1	NR2B1	3	2
NR0B1	NR2B2	3	2
NR0B1	NR2B3	0	1
NR0B1	NR3C1	3	2
NR0B1	NR3C2	3	2

## Sheet: interactions_distribution
all interactions (L1+L2+L3)					d1+d2 dimers (L1+L2+L3)						non d1+d2 interactions (L1+L2+L3)
		Interactors	Number of proteins with K interactors				Interactors	Number of proteins with K interactors					Interactors	Number of proteins with K interactors
NR1F1	1	1-2	10		NR1F1	1	1-2	16			NR1B3	1	1-2	21
NR2A2	1	3-4	7		NR1I3	1	3-4	11			NR1I1	1	3-4	5
NR1D1	2	5-6	7		NR2A1	1	5-6	6			NR1I2	1	5-6	4
NR1D2	2	7-8	10		NR2C1	1	7-8	1			NR1I3	1	7-8	1
NR1H4	2	9-10	4		NR3B2	1	9-10	1			NR2A1	1	9-10	2
NR1I3	2	11-12	1		NR3C3	1	11-12	0			NR2A2	1	11-12	0
NR2A1	2	13-14	0		NR1D1	2	13-14	0			NR2B2	1	13-14	0
NR3C2	2	15-16	2		NR1D2	2	15-16	2			NR2F1	1	15-16	0
NR5A1	2	17-18	0		NR1H4	2	17-18	0			NR2F2	1	17-18	0
NR5A2	2	19-20	0		NR2C2	2	19-20	1			NR4A1	1	19-20	0
NR2C1	3	21-22	1		NR3A1	2	21-22	0			NR4A2	1	21-22	1
NR3B2	3	23-24	1		NR3A2	2	23-24	0			NR4A3	1	23-24	0
NR3C3	3				NR3B1	2					NR2C1	2
NR2C2	4				NR3B3	2					NR2C2	2
NR3B1	4				NR3C2	2					NR2F6	2
NR3B3	4				NR3C4	2					NR3B1	2
NR4A3	4				NR1H2	3					NR3B2	2
NR1B2	5				NR1H3	3					NR3B3	2
NR1I1	5				NR3C1	3					NR3C3	2
NR1I2	5				NR4A3	3					NR5A1	2
NR2F1	5				NR1C1	4					NR5A2	2
NR1B3	6				NR1C2	4					NR1C1	3
NR2F6	6				NR1C3	4					NR1C2	3
NR3A2	6				NR1I1	4					NR1C3	4
NR1A2	7				NR1I2	4					NR2B1	4
NR1C1	7				NR2F1	4					NR3A2	4
NR1C2	7				NR2F6	4					NR1B1	5
NR2F2	7				NR1B1	5					NR1H2	5
NR4A1	7				NR1B2	5					NR1H3	5
NR4A2	7				NR1B3	5					NR3C1	5
NR1C3	8				NR2F2	6					NR3C4	7
NR1H2	8				NR4A1	6					NR0B1	10
NR1H3	8				NR4A2	6					NR3A1	10
NR3C1	8				NR1A2	7					NR0B2	21
NR3C4	9				NR1A1	10
NR0B1	10				NR2B2	15
NR1A1	10				NR2B3	15
NR1B1	10				NR2B1	20
NR3A1	12
NR2B3	15
NR2B2	16
NR0B2	21
NR2B1	24
all interactions (L1+L2+L3)					d1+d2 dimers (L1+L2+L3)						non d1+d2 interactions (L1+L2+L3)
		Interactors	Number of proteins with K interactors				Interactors	Number of proteins with K interactors					Interactors	Number of proteins with K interactors
NR1F1	1	1	2		NR1F1	1	1	6			NR1B3	1	1	12
NR2A2	1	2	8		NR1I3	1	2	10			NR1I1	1	2	9
NR1D1	2	3	3		NR2A1	1	3	4			NR1I2	1	3	2
NR1D2	2	4	4		NR2C1	1	4	7			NR1I3	1	4	3
NR1H4	2	5	4		NR3B2	1	5	3			NR2A1	1	5	4
NR1I3	2	6	3		NR3C3	1	6	3			NR2A2	1	6	0
NR2A1	2	7	6		NR1D1	2	7	1			NR2B2	1	7	1
NR3C2	2	8	4		NR1D2	2	8	0			NR2F1	1	8	0
NR5A1	2	9	1		NR1H4	2	9	0			NR2F2	1	9	0
NR5A2	2	10	3		NR2C2	2	10	1			NR4A1	1	10	2
NR2C1	3	11	0		NR3A1	2	11	0			NR4A2	1	11	0
NR3B2	3	12	1		NR3A2	2	12	0			NR4A3	1	12	0
NR3C3	3	13	0		NR3B1	2	13	0			NR2C1	2	13	0
NR2C2	4	14	0		NR3B3	2	14	0			NR2C2	2	14	0
NR3B1	4	15	1		NR3C2	2	15	2			NR2F6	2	15	0
NR3B3	4	16	1		NR3C4	2	16	0			NR3B1	2	16	0
NR4A3	4	17	0		NR1H2	3	17	0			NR3B2	2	17	0
NR1B2	5	18	0		NR1H3	3	18	0			NR3B3	2	18	0
NR1I1	5	19	0		NR3C1	3	19	0			NR3C3	2	19	0
NR1I2	5	20	0		NR4A3	3	20	1			NR5A1	2	20	0
NR2F1	5	21	1		NR1C1	4		0			NR5A2	2	21	1
NR1B3	6	22	0		NR1C2	4					NR1C1	3		0
NR2F6	6	23	0		NR1C3	4					NR1C2	3
NR3A2	6	24	1		NR1I1	4					NR1C3	4
NR1A2	7		0		NR1I2	4					NR2B1	4
NR1C1	7				NR2F1	4					NR3A2	4
NR1C2	7				NR2F6	4					NR1B1	5
NR2F2	7				NR1B1	5					NR1H2	5
NR4A1	7				NR1B2	5					NR1H3	5
NR4A2	7				NR1B3	5					NR3C1	5
NR1C3	8				NR2F2	6					NR3C4	7
NR1H2	8				NR4A1	6					NR0B1	10
NR1H3	8				NR4A2	6					NR3A1	10
NR3C1	8				NR1A2	7					NR0B2	21
NR3C4	9				NR1A1	10
NR0B1	10				NR2B2	15
NR1A1	10				NR2B3	15
NR1B1	10				NR2B1	20
NR3A1	12
NR2B3	15
NR2B2	16
NR0B2	21
NR2B1	24
all interactions (L1+L2+L3)					d1+d2 dimers (L1+L2+L3)						non d1+d2 interactions (L1+L2+L3)
Interactors	Number of proteins with K interactors	log	log		Interactors	Number of proteins with K interactors	log	log			Interactors	Number of proteins with K interactors	log	log
1	2	0	0.30103		1	6	0	0.778151			1	12	0	1.07918
2	8	0.30103	0.90309		2	10	0.30103	1			2	9	0.30103	0.954243
3	3	0.477121	0.477121		3	4	0.477121	0.60206			3	2	0.477121	0.30103
4	4	0.60206	0.60206		4	7	0.60206	0.845098			4	3	0.60206	0.477121
5	4	0.69897	0.60206		5	3	0.69897	0.477121			5	4	0.69897	0.60206
6	3	0.778151	0.477121		6	3	0.778151	0.477121			7	1	0.845098	0
7	6	0.845098	0.778151		7	1	0.845098	0			10	2	1	0.30103
8	4	0.90309	0.60206		10	1	1	0			21	1	1.32222	0
9	1	0.954243	0		15	2	1.17609	0.30103
10	3	1	0.477121		20	1	1.30103	0
12	1	1.07918	0
15	1	1.17609	0
16	1	1.20412	0
21	1	1.32222	0
24	1	1.38021	0
all interactions (L1+L2+L3)								d1+d2 dimers (L1+L2+L3)						non d1+d2 interactions (L1+L2+L3)
Interactors	Number of proteins with K interactors	FREQ of Number of proteins with K interactors	log interactors	log FREQ				Interactors	Number of proteins with K interactors	FREQ of Number of proteins with K interactors	log interactors	log FREQ		Interactors	Number of proteins with K interactors	FREQ of Number of proteins with K interactors	log interactors	log FREQ
1	2	0.0465116	0	-1.33244				1	6	0.157895	0	-0.801632		1	12	0.352941	0	-0.452298
2	8	0.186047	0.30103	-0.730378				2	10	0.263158	0.30103	-0.579784		2	9	0.264706	0.30103	-0.577236
3	3	0.0697674	0.477121	-1.15635				3	4	0.105263	0.477121	-0.977724		3	2	0.0588235	0.477121	-1.23045
4	4	0.0930233	0.60206	-1.03141				4	7	0.184211	0.60206	-0.734686		4	3	0.0882353	0.60206	-1.05436
5	4	0.0930233	0.69897	-1.03141				5	3	0.0789474	0.69897	-1.10266		5	4	0.117647	0.69897	-0.929419
6	3	0.0697674	0.778151	-1.15635				6	3	0.0789474	0.778151	-1.10266		7	1	0.0294118	0.845098	-1.53148
7	6	0.139535	0.845098	-0.855317				7	1	0.0263158	0.845098	-1.57978		10	2	0.0588235	1	-1.23045
8	4	0.0930233	0.90309	-1.03141				10	1	0.0263158	1	-1.57978		21	1	0.0294118	1.32222	-1.53148
9	1	0.0232558	0.954243	-1.63347				15	2	0.0526316	1.17609	-1.27875			34
10	3	0.0697674	1	-1.15635				20	1	0.0263158	1.30103	-1.57978
12	1	0.0232558	1.07918	-1.63347
15	1	0.0232558	1.17609	-1.63347
16	1	0.0232558	1.20412	-1.63347
21	1	0.0232558	1.32222	-1.63347
24	1	0.0232558	1.38021	-1.63347

## Sheet: protein-DNA-interactions
This page contains protein-DNA interactions among Nuclear Receptors
First column contains the pubmed ID from where we found the protein-DNA interaction
Second column contains the transcription factor that binds to the promoter. It can be a heterodimer. The name of the gene may be specific or generic
Third column contains the downstream target. The gene name is specific
Fourth column indicates if the protein-DNA interaction is activation or inhibition of the downstream target
PubMed ID	TF	Downstream Target in Humans	Activation or Inhibition
9006910	COUPTF1	RXR_g	inhibition
10629053	COUPTF1 (Dimer)	RAR_b	activation
10629053	COUPTF2 (Dimer)	RAR_b	activation
12842887	ER_a (monomer)	SHP	activation
10894148	ER_a:sp1	PR	activation
9626663	ER_a:sp1	RAR_a	activation
9824153	ERR_a (monomer)	TR_a	activation
16314306	ERR_g	DAX1	activation
11705994	ERR_g (monomer)	SHP	activation
12842887	HNF4 (Dimer)	SHP	activation
10409629	LRH1 (monomer)	SHP	activation
10076997	Rev-ERBA (Dimer)	Rev-ERBA	inhibition
8114692	RXR_a:CAR	RAR_b	activation
12554753	RXR_a:FXR	PPAR_a	activation
11030332	RXR_a:FXR	SHP	activation
11604492	RXR_a:LXR_a	LXR_a	activation
12554795	RXR_a:LXR_a	SHP	activation
10076997	RXR_a:PPAR:a	Rev-ERBA	activation
11604492	RXR_a:PPAR_g	LXR_a	activation
12839938	RXR_a:PPAR_g	RAR_b	activation
12821652	RXR_a:PPAR_g	Rev-ERBA	activation
8001825	RXR_a:RAR_a	RAR_b	activation
2153268	RXR_a:RAR_b	RAR_b	activation
9006910	RXR_a:RAR_b	RXR_g	activation
9006910	RXR_a:RXR_a	RXR_g	activation
10409629	SF1 (monomer)	SHP	activation
9232190	SF1 {monomer}	DAX1	activation
10766818	TR2 (Dimer)	RAR_b	activation
