# Supplementary material for: A protein interaction atlas for the nuclear receptors: properties and quality of a hub-based dimerisation network
Source: BMC Syst Biol. 2007 Jul 31;1:34. doi: 10.1186/1752-0509-1-34 (PMC1971058; doi:10.1186/1752-0509-1-34)
Supplement: Additional file 3 — Tissue presence of NRs. It contains in 4 worksheets, i) the presence or absence of NRs in the 61 normal human tissues, ii) the number of human tissues where any potential pair of NRs is co-expressed, iii) the presence or absence of NRs in the 39 normal mouse tissues, iv) the number of mouse tissues where any potential pair of NRs is co-expressed. [file 1752-0509-1-34-S3.xls]

## Sheet: TissuePresence_Human
					BLOOD VESSEL	CARDIOVASCULAR SYSTEM	CARDIOVASCULAR SYSTEM	CARDIOVASCULAR SYSTEM	CARDIOVASCULAR SYSTEM	CARDIOVASCULAR SYSTEM	DIGESTIVE ORGANS	DIGESTIVE ORGANS	DIGESTIVE SYSTEM	DIGESTIVE SYSTEM	DIGESTIVE SYSTEM	DIGESTIVE SYSTEM	DIGESTIVE SYSTEM	DIGESTIVE SYSTEM	DIGESTIVE SYSTEM	DIGESTIVE SYSTEM	ENDOCRINE GLAND	ENDOCRINE GLAND	FEMALE GENITAL SYSTEM	FEMALE GENITAL SYSTEM	FEMALE GENITAL SYSTEM	FEMALE GENITAL SYSTEM	FEMALE GENITAL SYSTEM	FEMALE GENITAL SYSTEM	HEMATOPOIETIC SYSTEM	HEMATOPOIETIC SYSTEM	HEMATOPOIETIC SYSTEM	INTEGUMENTARY SYSTEM	INTEGUMENTARY SYSTEM	INTEGUMENTARY SYSTEM	MALE GENITAL SYSTEM	MUSCULOSKELETAL SYSTEM	MUSCULOSKELETAL SYSTEM	MUSCULOSKELETAL SYSTEM	NERVOUS SYSTEM	NERVOUS SYSTEM	NERVOUS SYSTEM	NERVOUS SYSTEM	NERVOUS SYSTEM	NERVOUS SYSTEM	NERVOUS SYSTEM	NERVOUS SYSTEM	NERVOUS SYSTEM	NERVOUS SYSTEM	NERVOUS SYSTEM
preferred term	NRDB nomenclature	AZ name	Number of tissues the mRNA is present	Total Number of Probesets	Vein	Heart	Left atrium	Left ventricle	Right atrium	Right ventricle	Liver	Pancreas	Colon	Duodenum	Esophagus	Ileum	Jejunum	Rectum	Small intestine	Stomach	Adrenal gland	Thyroid gland	Cervix	Endometrium	Fallopian tube	Myometrium	Ovary	Uterus	Lymph node	Spleen	Thymus	Adipose tissue of breast	Breast	Skin	Prostate	Adipose tissue	Omentum	Skeletal muscle	Amygdaloid nucleus	Caudate nucleus	Cerebellum	Cingulate gyrus	Corpus callosum	Entorhinal cortex	Frontal cortex	Globus pallidus	Hippocampus	Hypothalamus	Locus ceruleus
DAX1	NR0B1	NR0B1	3	2	0	0	0	0	0	0	0	1	0	0	0	0	0	0	0	0	1	0	0	0	0	0	1	0	0	0	0	0	0	0	0	0	0	0	0	0	0	0	0	0	0	0	0	0	0
SHP	NR0B2	NR0B2	3	1	0	0	0	0	0	0	1	0	0	1	0	0	1	0	0	0	0	0	0	0	0	0	0	0	0	0	0	0	0	0	0	0	0	0	0	0	0	0	0	0	0	0	0	0	0
TR-alpha	NR1A1	THRA	61	4	1	1	1	1	1	1	1	1	1	1	1	1	1	1	1	1	1	1	1	1	1	1	1	1	1	1	1	1	1	1	1	1	1	1	1	1	1	1	1	1	1	1	1	1	1
TR-beta	NR1A2	THRB	0	1	0	0	0	0	0	0	0	0	0	0	0	0	0	0	0	0	0	0	0	0	0	0	0	0	0	0	0	0	0	0	0	0	0	0	0	0	0	0	0	0	0	0	0	0	0
RAR-alpha	NR1B1	RARA	35	4	1	0	1	1	1	1	1	0	1	1	1	1	1	1	1	1	1	1	1	1	1	1	1	1	1	1	1	1	1	1	1	1	1	1	0	0	0	0	0	0	0	0	0	0	0
RAR-beta	NR1B2	RARB	61	5	1	1	1	1	1	1	1	1	1	1	1	1	1	1	1	1	1	1	1	1	1	1	1	1	1	1	1	1	1	1	1	1	1	1	1	1	1	1	1	1	1	1	1	1	1
RAR-gamma	NR1B3	RARG	1	2	0	0	0	0	0	0	0	0	0	0	1	0	0	0	0	0	0	0	0	0	0	0	0	0	0	0	0	0	0	0	0	0	0	0	0	0	0	0	0	0	0	0	0	0	0
PPAR-alpha	NR1C1	PPARA*	31	6	1	1	1	1	1	1	1	0	1	1	1	1	1	1	1	0	0	1	0	0	1	1	1	0	0	0	0	1	0	1	1	1	1	1	0	1	0	0	0	0	0	1	0	1	0
PPAR-beta	NR1C2	PPARD	2	3	0	0	0	0	0	0	0	0	0	0	0	0	0	0	0	0	0	1	0	0	0	0	0	0	0	0	0	0	0	0	0	0	0	0	0	0	0	0	0	0	0	0	0	0	0
PPAR-gamma	NR1C3	PPARG	12	1	0	0	0	0	0	0	0	0	1	1	0	0	1	1	0	1	0	0	0	0	0	0	1	0	0	0	0	1	1	0	0	1	1	0	0	0	0	0	0	0	0	0	0	0	0
Rev-ErbA-alpha	NR1D1	NR1D1	31	3	1	1	0	0	1	1	0	0	0	0	0	0	0	0	0	0	0	0	0	1	0	1	1	1	0	0	0	1	0	1	0	0	0	1	1	1	1	1	0	1	1	1	1	1	1
Rev-ErbA-beta	NR1D2	NR1D2	61	2	1	1	1	1	1	1	1	1	1	1	1	1	1	1	1	1	1	1	1	1	1	1	1	1	1	1	1	1	1	1	1	1	1	1	1	1	1	1	1	1	1	1	1	1	1
ROR-alpha	NR1F1	RORA	16	4	1	1	0	0	0	0	1	0	0	0	1	0	0	1	0	0	1	1	0	1	0	0	0	0	1	1	0	0	0	1	0	0	0	0	0	0	0	0	0	0	0	0	0	0	0
ROR-beta	NR1F2	RORB	2	2	0	0	0	0	0	0	0	0	0	0	0	0	0	0	0	0	0	0	0	1	0	0	0	0	0	0	0	0	0	0	0	0	0	0	0	0	0	0	0	0	0	0	0	0	0
ROR-gamma	NR1F3	RORC	3	2	0	0	0	0	0	0	1	0	0	0	0	0	0	0	0	0	0	1	0	0	0	0	0	0	0	0	1	0	0	0	0	0	0	0	0	0	0	0	0	0	0	0	0	0	0
LXR-beta	NR1H2	NR1H2	57	1	1	0	1	1	1	1	0	0	1	1	1	1	1	1	1	1	1	1	1	1	1	1	1	1	1	1	1	1	1	1	1	1	1	1	1	1	1	1	1	1	1	1	1	1	1
LXR-alpha	NR1H3	NR1H3	33	1	1	0	1	0	1	0	1	1	1	1	0	1	1	1	1	1	1	1	1	1	1	1	1	1	1	1	1	1	1	1	1	1	1	0	0	0	0	0	0	0	0	0	0	0	0
FXR	NR1H4	NR1H4	9	1	0	0	0	0	0	0	1	0	1	1	0	1	1	0	1	0	1	0	0	0	0	0	1	0	0	0	0	0	0	0	0	0	0	0	0	0	0	0	0	0	0	0	0	0	0
VDR	NR1I1	VDR	15	3	0	0	0	0	0	0	0	0	1	1	1	1	1	1	1	1	1	0	0	0	0	0	0	0	1	0	0	0	1	1	0	0	0	0	0	0	0	0	0	0	0	0	0	0	0
PXR	NR1I2	NR1I2	7	2	0	0	0	0	0	0	1	0	1	1	0	1	1	1	1	0	0	0	0	0	0	0	0	0	0	0	0	0	0	0	0	0	0	0	0	0	0	0	0	0	0	0	0	0	0
CAR	NR1I3	NR1I3	1	1	0	0	0	0	0	0	1	0	0	0	0	0	0	0	0	0	0	0	0	0	0	0	0	0	0	0	0	0	0	0	0	0	0	0	0	0	0	0	0	0	0	0	0	0	0
HNF4-alpha	NR2A1	HNF4A	18	5	0	0	0	0	0	0	1	1	1	1	1	1	1	1	1	1	0	0	0	0	1	0	0	0	0	0	0	1	0	1	0	0	0	0	0	0	1	1	0	1	0	0	1	0	0
HNF4-gamma	NR2A2	HNF4G	10	2	0	0	0	0	0	0	1	1	1	1	0	1	1	1	1	1	0	0	0	0	0	0	0	0	0	0	0	0	0	0	0	0	0	0	0	0	0	0	0	0	0	0	0	0	0
RXR-alpha	NR2B1	RXRA	61	2	1	1	1	1	1	1	1	1	1	1	1	1	1	1	1	1	1	1	1	1	1	1	1	1	1	1	1	1	1	1	1	1	1	1	1	1	1	1	1	1	1	1	1	1	1
RXR-beta	NR2B2	RXRB	61	3	1	1	1	1	1	1	1	1	1	1	1	1	1	1	1	1	1	1	1	1	1	1	1	1	1	1	1	1	1	1	1	1	1	1	1	1	1	1	1	1	1	1	1	1	1
RXR-gamma	NR2B3	RXRG	23	1	0	0	0	0	0	1	0	0	0	0	0	0	0	0	0	0	0	0	0	0	0	0	0	0	0	0	0	0	0	0	0	1	1	1	1	1	0	1	1	1	1	1	1	1	1
TR2	NR2C1	NR2C1	61	4	1	1	1	1	1	1	1	1	1	1	1	1	1	1	1	1	1	1	1	1	1	1	1	1	1	1	1	1	1	1	1	1	1	1	1	1	1	1	1	1	1	1	1	1	1
TR4	NR2C2	MRPS25/NR2C2	61	2	1	1	1	1	1	1	1	1	1	1	1	1	1	1	1	1	1	1	1	1	1	1	1	1	1	1	1	1	1	1	1	1	1	1	1	1	1	1	1	1	1	1	1	1	1
TLX	NR2E1	NR2E1	9	1	0	0	0	0	0	0	0	0	0	0	0	0	0	0	0	0	0	0	0	0	0	0	0	0	0	0	0	0	0	0	0	0	0	0	1	1	0	0	0	1	1	0	1	0	0
PNR	NR2E3	NR2E3	0	2	0	0	0	0	0	0	0	0	0	0	0	0	0	0	0	0	0	0	0	0	0	0	0	0	0	0	0	0	0	0	0	0	0	0	0	0	0	0	0	0	0	0	0	0	0
COUP-TF1	NR2F1	NR2F1	47	2	0	0	1	0	1	0	1	0	0	0	1	1	0	0	0	1	1	1	1	1	1	1	1	1	1	0	0	1	1	0	1	1	1	0	1	1	1	1	1	1	1	1	1	1	1
COUP-TF2	NR2F2	NR2F2	61	4	1	1	1	1	1	1	1	1	1	1	1	1	1	1	1	1	1	1	1	1	1	1	1	1	1	1	1	1	1	1	1	1	1	1	1	1	1	1	1	1	1	1	1	1	1
EAR2	NR2F6	NR2F6	29	2	0	0	0	1	0	0	1	1	1	1	1	1	1	1	1	1	0	1	0	0	1	0	0	0	0	0	0	1	1	0	1	0	0	1	1	0	1	1	0	0	1	0	0	1	0
ER-alpha	NR3A1	ESR1	18	7	1	0	0	0	0	0	1	0	0	0	0	0	0	0	0	0	0	1	1	1	1	1	1	1	0	0	0	1	1	1	1	1	1	1	0	0	0	0	0	0	0	0	0	0	0
ER-beta	NR3A2	ESR2	0	6	0	0	0	0	0	0	0	0	0	0	0	0	0	0	0	0	0	0	0	0	0	0	0	0	0	0	0	0	0	0	0	0	0	0	0	0	0	0	0	0	0	0	0	0	0
ERR-alpha	NR3B1	ESRRA	39	2	1	1	1	1	1	1	1	1	1	1	1	1	1	1	1	1	1	1	0	1	1	0	0	0	1	1	1	1	1	1	1	1	1	1	0	0	1	0	0	0	0	0	0	0	0
ERR-beta	NR3B2	ESRRB	0	1	0	0	0	0	0	0	0	0	0	0	0	0	0	0	0	0	0	0	0	0	0	0	0	0	0	0	0	0	0	0	0	0	0	0	0	0	0	0	0	0	0	0	0	0	0
ERR-gamma	NR3B3	ESRRG	32	2	0	1	0	1	0	1	0	0	0	1	0	0	1	0	0	1	0	0	0	0	0	0	0	0	0	0	0	0	0	0	1	0	0	1	1	1	1	1	0	1	1	1	1	1	1
GR	NR3C1	NR3C1	61	4	1	1	1	1	1	1	1	1	1	1	1	1	1	1	1	1	1	1	1	1	1	1	1	1	1	1	1	1	1	1	1	1	1	1	1	1	1	1	1	1	1	1	1	1	1
MR	NR3C2	NR3C2	61	1	1	1	1	1	1	1	1	1	1	1	1	1	1	1	1	1	1	1	1	1	1	1	1	1	1	1	1	1	1	1	1	1	1	1	1	1	1	1	1	1	1	1	1	1	1
PR	NR3C3	PGR	3	1	0	0	0	0	0	0	0	0	0	0	0	0	0	0	0	0	0	0	0	1	0	1	0	1	0	0	0	0	0	0	0	0	0	0	0	0	0	0	0	0	0	0	0	0	0
AR	NR3C4	AR	1	1	0	0	0	0	0	0	0	0	0	0	0	0	0	0	0	0	0	0	0	0	1	0	0	0	0	0	0	0	0	0	0	0	0	0	0	0	0	0	0	0	0	0	0	0	0
Nur77	NR4A1	NR4A1	30	2	1	0	1	1	1	1	0	1	1	0	1	1	0	1	1	1	1	1	1	1	1	1	1	1	1	0	0	1	1	1	1	1	1	1	0	0	0	0	0	0	0	0	0	0	0
Nurr1	NR4A2	NR4A2	60	4	1	1	1	0	1	1	1	1	1	1	1	1	1	1	1	1	1	1	1	1	1	1	1	1	1	1	1	1	1	1	1	1	1	1	1	1	1	1	1	1	1	1	1	1	1
MINOR	NR4A3	NR4A3	26	3	0	0	1	1	1	0	0	1	0	0	0	0	0	1	0	1	1	1	0	0	0	0	1	0	1	0	1	0	0	0	1	0	1	0	0	1	1	1	1	1	0	0	1	1	1
SF-1	NR5A1	NR5A1	0	1	0	0	0	0	0	0	0	0	0	0	0	0	0	0	0	0	0	0	0	0	0	0	0	0	0	0	0	0	0	0	0	0	0	0	0	0	0	0	0	0	0	0	0	0	0
LRH-1	NR5A2	NR5A2	12	3	0	0	0	0	0	0	1	1	1	1	0	1	1	1	1	0	0	0	0	1	0	1	0	1	0	0	0	1	0	0	0	0	0	0	0	0	0	0	0	0	0	0	0	0	0
RTR	NR6A1	NR6A1	0	7	0	0	0	0	0	0	0	0	0	0	0	0	0	0	0	0	0	0	0	0	0	0	0	0	0	0	0	0	0	0	0	0	0	0	0	0	0	0	0	0	0	0	0	0	0
[truncated: 16 more columns]

## Sheet: CoexpressionMatrix_Human
		NR0B1	NR0B2	NR1A1	NR1A2	NR1B1	NR1B2	NR1B3	NR1C1	NR1C2	NR1C3	NR1D1	NR1D2	NR1F1	NR1F2	NR1F3	NR1H2	NR1H3	NR1H4	NR1I1	NR1I2	NR1I3	NR2A1	NR2A2	NR2B1	NR2B2	NR2B3	NR2C1	NR2C2	NR2E1	NR2E3	NR2F1	NR2F2	NR2F6	NR3A1	NR3A2	NR3B1	NR3B2	NR3B3	NR3C1	NR3C2	NR3C3	NR3C4	NR4A1	NR4A2	NR4A3	NR5A1	NR5A2	NR6A1
Gene A (official name)	Gene A (display name)	DAX1 [NR0B1]	SHP [NR0B2]	TR_a [NR1A1]	TR_b [NR1A2]	RAR_a [NR1B1]	RAR_b [NR1B2]	RAR_g [NR1B3]	PPAR_a [NR1C1]	PPAR_b [NR1C2]	PPAR_g [NR1C3]	REV-ERBA_a [NR1D1]	REV-ERBA_b [NR1D2]	ROR_a [NR1F1]	ROR_b [NR1F2]	ROR_g [NR1F3]	LXR_b [NR1H2]	LXR_a [NR1H3]	FXR [NR1H4]	VDR [NR1I1]	PXR [NR1I2]	CAR [NR1I3]	HNF4_a [NR2A1]	HNF4_g [NR2A2]	RXR_a [NR2B1]	RXR_b [NR2B2]	RXR_g [NR2B3]	TR2 [NR2C1]	TR4 [NR2C2]	TLX [NR2E1]	PNR [NR2E3]	COUP-TF1 [NR2F1]	COUP-TF2 [NR2F2]	EAR2 [NR2F6]	ER_a [NR3A1]	ER_b [NR3A2]	ERR_a [NR3B1]	ERR_b [NR3B2]	ERR_g [NR3B3]	GR [NR3C1]	MR [NR3C2]	PR [NR3C3]	AR [NR3C4]	NUR77 [NR4A1]	NURR1 [NR4A2]	MINOR [NR4A3]	SF1 [NR5A1]	LRH1 [NR5A2]	RTR [NR6A1]
NR0B1	DAX1 [NR0B1]	3		3		2	3		1		1	1	3	1			2	3	2	1			1	1	3	3		3	3			2	3	1	1		2			3	3			3	3	3		1
NR0B2	SHP [NR0B2]		3	3		3	3		3		2		3	1		1	2	3	3	2	3	1	3	3	3	3		3	3			1	3	3	1		3		2	3	3				3			3
NR1A1	TR_a [NR1A1]	3	3	61		35	61	1	31	2	12	31	61	16	2	3	57	33	9	15	7	1	18	10	61	61	23	61	61	9		47	61	29	18		39		32	61	61	3	1	30	60	26		12
NR1A2	TR_b [NR1A2]
NR1B1	RAR_a [NR1B1]	2	3	35		35	35	1	24	2	12	10	35	13	1	3	33	31	9	15	7	1	13	9	35	35	4	35	35			23	35	18	18		31		9	35	35	3	1	29	34	15		11
NR1B2	RAR_b [NR1B2]	3	3	61		35	61	1	31	2	12	31	61	16	2	3	57	33	9	15	7	1	18	10	61	61	23	61	61	9		47	61	29	18		39		32	61	61	3	1	30	60	26		12
NR1B3	RAR_g [NR1B3]			1		1	1	1	1				1	1			1			1			1		1	1		1	1			1	1	1			1			1	1			1	1
NR1C1	PPAR_a [NR1C1]	1	3	31		24	31	1	31	1	8	13	31	8		2	29	21	8	9	7	1	12	8	31	31	10	31	31	1		20	31	16	13		23		13	31	31	1	1	21	30	12		9
NR1C2	PPAR_b [NR1C2]			2		2	2		1	2	1		2	2		1	1	2		1					2	2		2	2			2	2	2	1		2		1	2	2			1	2	2
NR1C3	PPAR_g [NR1C3]	1	2	12		12	12		8	1	12	2	12	3			11	12	4	8	4		6	5	12	12	2	12	12			8	12	8	6		11		4	12	12			9	12	6		5
NR1D1	REV-ERBA_a [NR1D1]	1		31		10	31		13		2	31	31	6	2		30	8	1	1			6		31	31	17	31	31	9		26	31	12	8		14		23	31	31	3		10	31	10		4
NR1D2	REV-ERBA_b [NR1D2]	3	3	61		35	61	1	31	2	12	31	61	16	2	3	57	33	9	15	7	1	18	10	61	61	23	61	61	9		47	61	29	18		39		32	61	61	3	1	30	60	26		12
NR1F1	ROR_a [NR1F1]	1	1	16		13	16	1	8	2	3	6	16	16	1	2	13	12	3	8	2	1	5	3	16	16		16	16			11	16	7	7		16		5	16	16	1		10	16	7		3
NR1F2	ROR_b [NR1F2]			2		1	2					2	2	1	2		2	1							2	2		2	2			2	2	1	1		2		1	2	2	1		1	2			1
NR1F3	ROR_g [NR1F3]		1	3		3	3		2	1			3	2		3	2	3	1		1	1	1	1	3	3		3	3			2	3	2	2		3			3	3			1	3	2		1
NR1H2	LXR_b [NR1H2]	2	2	57		33	57	1	29	1	11	30	57	13	2	2	57	30	8	14	6		16	8	57	57	23	57	57	9		45	57	26	17		35		30	57	57	3	1	29	56	24		10
NR1H3	LXR_a [NR1H3]	3	3	33		31	33		21	2	12	8	33	12	1	3	30	33	9	14	7	1	13	10	33	33	3	33	33			23	33	16	17		28		7	33	33	3	1	26	33	15		12
NR1H4	FXR [NR1H4]	2	3	9		9	9		8		4	1	9	3		1	8	9	9	7	6	1	7	7	9	9		9	9			5	9	7	3		8		3	9	9			6	9	3		6
NR1I1	VDR [NR1I1]	1	2	15		15	15	1	9	1	8	1	15	8			14	14	7	15	6		10	8	15	15		15	15			9	15	11	4		15		5	15	15			12	15	7		6
NR1I2	PXR [NR1I2]		3	7		7	7		7		4		7	2		1	6	7	6	6	7	1	7	7	7	7		7	7			2	7	7	1		7		2	7	7			4	7	1		7
NR1I3	CAR [NR1I3]		1	1		1	1		1				1	1		1		1	1		1	1	1	1	1	1		1	1			1	1	1	1		1			1	1				1			1
NR2A1	HNF4_a [NR2A1]	1	3	18		13	18	1	12		6	6	18	5		1	16	13	7	10	7	1	18	10	18	18	3	18	18	2		11	18	15	5		15		8	18	18		1	11	18	8		9
NR2A2	HNF4_g [NR2A2]	1	3	10		9	10		8		5		10	3		1	8	10	7	8	7	1	10	10	10	10		10	10			4	10	10	2		10		4	10	10			7	10	4		8
NR2B1	RXR_a [NR2B1]	3	3	61		35	61	1	31	2	12	31	61	16	2	3	57	33	9	15	7	1	18	10	61	61	23	61	61	9		47	61	29	18		39		32	61	61	3	1	30	60	26		12
NR2B2	RXR_b [NR2B2]	3	3	61		35	61	1	31	2	12	31	61	16	2	3	57	33	9	15	7	1	18	10	61	61	23	61	61	9		47	61	29	18		39		32	61	61	3	1	30	60	26		12
NR2B3	RXR_g [NR2B3]			23		4	23		10		2	17	23				23	3					3		23	23	23	23	23	9		21	23	7	3		5		19	23	23			4	23	10
NR2C1	TR2 [NR2C1]	3	3	61		35	61	1	31	2	12	31	61	16	2	3	57	33	9	15	7	1	18	10	61	61	23	61	61	9		47	61	29	18		39		32	61	61	3	1	30	60	26		12
NR2C2	TR4 [NR2C2]	3	3	61		35	61	1	31	2	12	31	61	16	2	3	57	33	9	15	7	1	18	10	61	61	23	61	61	9		47	61	29	18		39		32	61	61	3	1	30	60	26		12
NR2E1	TLX [NR2E1]			9			9		1			9	9				9						2		9	9	9	9	9	9		9	9	4					9	9	9				9	4
NR2E3	PNR [NR2E3]
NR2F1	COUP-TF1 [NR2F1]	2	1	47		23	47	1	20	2	8	26	47	11	2	2	45	23	5	9	2	1	11	4	47	47	21	47	47	9		47	47	21	15		25		26	47	47	3	1	21	47	22		6
NR2F2	COUP-TF2 [NR2F2]	3	3	61		35	61	1	31	2	12	31	61	16	2	3	57	33	9	15	7	1	18	10	61	61	23	61	61	9		47	61	29	18		39		32	61	61	3	1	30	60	26		12
NR2F6	EAR2 [NR2F6]	1	3	29		18	29	1	16	2	8	12	29	7	1	2	26	16	7	11	7	1	15	10	29	29	7	29	29	4		21	29	29	8		23		18	29	29		1	15	28	11		9
NR3A1	ER_a [NR3A1]	1	1	18		18	18		13	1	6	8	18	7	1	2	17	17	3	4	1	1	5	2	18	18	3	18	18			15	18	8	18		14		3	18	18	3	1	17	18	6		5
NR3A2	ER_b [NR3A2]
NR3B1	ERR_a [NR3B1]	2	3	39		31	39	1	23	2	11	14	39	16	2	3	35	28	8	15	7	1	15	10	39	39	5	39	39			25	39	23	14		39		16	39	39	1	1	26	38	16		10
NR3B2	ERR_b [NR3B2]
NR3B3	ERR_g [NR3B3]		2	32		9	32		13	1	4	23	32	5	1		30	7	3	5	2		8	4	32	32	19	32	32	9		26	32	18	3		16		32	32	32			6	31	13		2
NR3C1	GR [NR3C1]	3	3	61		35	61	1	31	2	12	31	61	16	2	3	57	33	9	15	7	1	18	10	61	61	23	61	61	9		47	61	29	18		39		32	61	61	3	1	30	60	26		12
NR3C2	MR [NR3C2]	3	3	61		35	61	1	31	2	12	31	61	16	2	3	57	33	9	15	7	1	18	10	61	61	23	61	61	9		47	61	29	18		39		32	61	61	3	1	30	60	26		12
NR3C3	PR [NR3C3]			3		3	3		1			3	3	1	1		3	3							3	3		3	3			3	3		3		1			3	3	3		3	3			3
NR3C4	AR [NR3C4]			1		1	1		1				1				1	1					1		1	1		1	1			1	1	1	1		1			1	1		1	1	1
NR4A1	NUR77 [NR4A1]	3		30		29	30	1	21	1	9	10	30	10	1	1	29	26	6	12	4		11	7	30	30	4	30	30			21	30	15	17		26		6	30	30	3	1	30	29	14		9
NR4A2	NURR1 [NR4A2]	3	3	60		34	60	1	30	2	12	31	60	16	2	3	56	33	9	15	7	1	18	10	60	60	23	60	60	9		47	60	28	18		38		31	60	60	3	1	29	60	25		12
NR4A3	MINOR [NR4A3]	3		26		15	26		12	2	6	10	26	7		2	24	15	3	7	1		8	4	26	26	10	26	26	4		22	26	11	6		16		13	26	26			14	25	26		2
NR5A1	SF1 [NR5A1]
NR5A2	LRH1 [NR5A2]	1	3	12		11	12		9		5	4	12	3	1	1	10	12	6	6	7	1	9	8	12	12		12	12			6	12	9	5		10		2	12	12	3		9	12	2		12
NR6A1	RTR [NR6A1]

## Sheet: TissuePresence_Mouse
		CNS	CNS	CNS	CNS	CNS	CNS	CNS	CNS	CNS	Endocrine	Endocrine	Endocrine	Metabolic	Metabolic	Metabolic	Metabolic	Metabolic	Metabolic	Metabolic	Metabolic	Metabolic	Adipose	Adipose	Immune	Immune	Reproductive	Reproductive	Reproductive	Reproductive	Reproductive	Reproductive	Reproductive	Reproductive	Respiratory	Respiratory	Respiratory	Structural	Structural	Structural
		Eye	Brain Stem	Cerebellum	Cerebrum	C. Striatum	Olfactory Bulb	Spinal Cord	Hypothalamus	Pituitary	Adrenal Gland	Thyroid	Pancreas	Tongue	Stomach	Duodenum	Jejunum	Ileum	Colon	Gall Bladder	Liver	Kidney	White Adipose	Brown Adipose	Spleen	Thymus	Ovary	Uterus	Epididymis	Preputial gland	Prostate	Seminal Ves.	Testis	Vas Deferens	Aorta	Heart	Lungs	Bone	Muscle	Skin	sum
NR0B1	DAX1	0	0	0	0	0	0	0	0	0	0	0	0	0	0	0	0	0	0	0	0	0	0	0	0	0	1	0	0	0	0	0	1	0	0	0	0	0	0	0	2
NR0B2	SHP	0	0	0	0	0	0	0	0	0	0	0	0	0	0	0	0	0	0	0	0	0	0	0	0	0	0	0	0	0	0	0	0	0	0	0	0	0	0	0	0
NR1A1	TR_a	1	1	1	1	1	1	1	1	1	1	1	1	1	1	1	1	1	1	1	0	1	1	1	0	1	1	1	1	1	1	1	1	1	1	1	1	1	1	1	37
NR1A2	TR_b	0	0	0	0	0	0	0	0	0	0	0	0	0	0	0	0	0	0	0	0	0	0	0	0	0	0	0	0	0	0	0	0	0	0	0	0	0	0	0	0
NR1B1	RAR_a	1	1	1	1	1	1	1	1	1	1	1	0	1	1	1	1	1	1	1	1	1	1	1	1	1	1	1	1	1	1	0	1	1	1	1	1	1	1	1	37
NR1B2	RAR_b	0	0	0	1	1	1	0	0	1	0	0	0	0	0	0	0	0	0	0	0	1	0	1	0	0	0	0	0	0	0	0	1	0	0	1	0	0	1	0	9
NR1B3	RAR_g	1	0	0	1	1	1	1	1	1	1	1	0	1	1	0	0	0	1	1	0	1	1	1	0	0	1	1	1	1	1	1	1	1	1	1	1	0	1	1	29
NR1C1	PPAR_a	0	0	0	0	0	0	0	0	0	0	0	0	0	0	0	0	0	0	0	1	1	0	1	0	0	0	0	0	1	0	0	0	0	0	1	0	0	0	0	5
NR1C2	PPAR_b	1	0	1	1	1	1	1	1	1	1	1	0	1	1	1	1	1	1	1	1	1	1	1	0	1	1	1	1	1	1	1	0	1	1	1	0	0	1	1	33
NR1C3	PPAR_g	0	0	0	0	0	0	0	0	0	0	0	0	0	1	0	0	0	1	0	0	0	1	1	0	0	0	0	0	1	0	0	0	0	0	0	0	0	0	0	5
NR1D1	REVERBA	1	1	1	1	1	1	1	1	1	1	0	0	1	0	0	0	0	0	1	0	1	1	1	0	0	1	0	0	0	0	0	1	1	1	1	0	0	1	0	21
NR1D2	REVERBB	1	1	1	1	1	1	1	1	0	0	0	0	1	0	0	0	0	0	0	0	1	0	0	0	1	1	0	1	0	0	0	1	1	0	1	0	0	1	0	17
NR1F1	ROR_a	1	1	1	1	1	1	1	1	0	0	1	0	1	0	0	0	0	0	0	1	1	1	0	0	0	0	0	0	1	0	0	1	1	1	0	0	0	1	1	19
NR1F2	ROR_b	1	0	0	1	1	0	1	1	1	0	0	0	0	0	0	0	0	0	0	0	0	0	0	0	0	0	0	0	0	0	0	0	0	0	0	0	0	0	0	6
NR1F3	ROR_g	1	1	1	0	0	0	1	0	1	1	1	1	1	1	1	1	1	1	1	1	1	1	1	0	1	1	1	1	1	1	1	1	1	1	1	1	0	1	1	33
NR1H2	LXR_b	1	1	1	1	1	1	1	1	1	1	1	1	1	1	1	1	1	1	1	1	1	1	1	1	1	1	1	1	1	1	1	1	1	1	1	1	1	1	1	39
NR1H3	LXR_a	0	0	1	0	0	0	0	0	1	1	0	0	0	0	1	1	1	1	1	1	1	1	1	1	0	0	0	0	0	0	0	1	0	1	1	1	0	1	0	18
NR1H4	FXR_a	0	0	0	0	0	0	0	0	0	1	0	0	0	1	1	1	1	1	1	1	1	0	0	0	0	1	0	0	0	0	0	0	0	0	0	0	0	0	0	10
NR1I1	VDR	0	0	0	0	0	0	0	0	0	0	1	0	0	0	1	1	1	1	0	0	1	0	0	0	0	0	0	0	1	0	0	0	0	0	0	0	1	0	1	9
NR1I2	PXR	0	0	0	0	0	0	0	0	0	0	0	0	0	0	0	0	0	0	0	0	0	0	0	0	0	0	0	0	0	0	0	0	0	0	0	0	0	0	0	0
NR1I3	CAR	0	0	0	0	0	0	0	0	0	0	0	0	0	0	0	0	0	0	0	0	0	0	0	0	0	0	0	0	0	0	0	0	0	0	0	0	0	0	0	0
NR2A1	HNF4_a	0	0	0	0	0	0	0	0	0	0	0	0	0	0	1	1	1	1	1	1	1	0	0	0	0	0	0	0	0	0	0	0	0	0	0	0	0	0	0	7
NR2A2	HNF4_g	0	0	0	0	0	0	0	0	0	0	0	0	0	1	1	1	1	1	1	0	1	0	0	0	0	0	0	0	0	0	0	0	0	0	0	0	0	0	0	7
NR2B1	RXR_a	1	1	1	1	1	1	1	1	1	1	1	1	1	1	1	1	1	1	1	1	1	1	1	1	1	1	1	1	1	1	1	1	1	1	1	1	1	1	1	39
NR2B2	RXR_b	1	1	1	1	1	1	1	1	1	1	1	1	1	1	1	1	1	1	1	1	1	1	1	1	1	1	1	1	1	1	1	1	1	1	1	1	1	1	1	39
NR2B3	RXR_g	1	1	0	1	1	1	1	1	1	0	1	0	1	0	0	0	0	0	0	1	0	1	1	1	1	0	0	0	0	1	0	1	1	1	1	0	0	1	1	22
NR2C1	TR2	0	0	0	0	0	0	0	0	0	0	0	0	0	0	0	0	0	0	0	0	0	0	0	0	0	0	0	0	0	0	0	0	0	0	0	0	0	0	0	0
NR2C2	TR4	0	0	0	0	0	0	0	0	0	0	0	0	0	0	0	0	0	0	0	0	0	0	0	0	0	0	0	0	0	0	0	0	0	0	0	0	0	0	0	0
NR2E1	TLX	0	0	0	0	0	0	0	0	0	0	0	0	0	0	0	0	0	0	0	0	0	0	0	0	0	0	0	0	0	0	0	0	0	0	0	0	0	0	0	0
NR2E3	PNR	1	0	0	0	0	0	0	0	0	0	0	0	0	0	0	0	0	0	0	0	0	0	0	0	0	0	0	0	0	0	0	0	0	0	0	0	0	0	0	1
NR2F1	COUPTF1	1	1	1	1	1	1	1	1	1	1	1	0	1	1	0	0	0	0	0	0	0	1	0	0	0	1	0	0	0	1	1	0	1	0	1	1	0	0	0	20
NR2F2	COUPTF2	1	1	1	1	1	1	1	1	1	1	1	0	1	1	0	0	1	1	1	1	1	1	1	1	0	1	1	1	1	1	0	1	1	1	1	1	0	1	1	33
NR2F6	EAR2	1	1	1	1	1	1	1	1	1	1	1	1	1	1	1	1	1	1	1	1	1	1	1	0	0	1	1	1	1	1	1	1	1	1	1	1	0	1	1	36
NR3A1	ER_a	0	0	0	0	0	0	0	0	1	0	0	0	0	0	0	0	0	0	0	0	0	1	1	0	0	1	1	1	0	1	0	0	1	1	0	0	0	1	1	11
NR3A2	ER_b	0	0	0	0	0	0	0	0	0	0	0	0	0	0	0	0	0	0	0	0	0	0	0	0	0	1	0	0	0	0	0	0	0	0	0	0	0	0	0	1
NR3B1	ERR_a	1	1	1	1	1	1	1	1	1	1	1	0	1	1	1	1	1	1	1	1	1	1	1	1	1	1	1	1	1	1	1	1	1	1	1	1	1	1	0	37
NR3B2	ERR_b	1	0	1	0	0	0	1	0	0	0	1	0	0	0	0	0	0	0	0	0	1	0	0	0	0	0	0	0	0	0	0	1	0	0	1	0	0	0	0	7
NR3B3	ERR_g	1	1	1	1	1	1	1	1	0	0	0	0	1	1	0	0	0	0	0	0	1	0	1	0	0	0	0	0	0	0	0	0	0	0	1	0	0	0	0	13
NR3C1	GR	1	1	1	1	1	1	1	1	1	1	1	0	1	1	1	1	1	1	1	1	1	1	1	1	1	1	1	1	1	1	1	1	1	1	1	1	1	1	1	38
NR3C2	MR	1	1	1	1	1	1	1	1	1	1	1	1	1	1	1	1	1	1	1	1	1	1	1	0	0	1	0	1	1	1	0	1	1	1	1	1	0	1	1	34
NR3C3	PR	0	1	1	1	1	1	1	1	1	0	0	0	0	0	0	0	0	0	0	0	1	0	0	0	1	1	1	0	0	1	0	0	0	1	0	1	0	0	0	15
NR3C4	AR	0	0	0	0	0	0	0	0	1	1	0	0	0	0	0	0	0	0	0	0	1	0	0	0	0	1	1	1	1	1	0	1	1	0	0	0	0	1	1	12
NR4A1	NGFIB	0	0	0	1	1	1	0	0	0	1	0	0	0	0	0	0	0	0	0	0	0	0	0	0	0	0	0	0	0	0	0	1	0	1	0	1	0	1	0	8
NR4A2	NURR1	0	1	1	1	1	1	0	1	1	1	0	0	0	1	0	0	0	0	0	0	0	0	0	0	0	0	0	0	0	0	0	0	0	0	0	1	0	0	0	10
NR4A3	NOR1	0	0	1	1	1	1	0	0	0	1	0	0	0	0	0	0	0	0	0	0	0	0	0	0	0	0	0	0	0	0	1	0	0	0	0	0	0	0	0	6
NR5A1	SF1	0	0	0	0	0	0	0	0	0	1	0	0	0	0	0	0	0	0	0	0	0	0	0	1	0	1	0	0	0	0	0	1	0	0	0	0	0	0	0	4
NR5A2	LRH1	0	0	0	0	0	0	0	0	0	0	0	0	0	0	0	1	1	1	1	1	0	0	0	0	0	1	0	0	0	0	0	0	0	0	0	0	0	0	0	6
NR6A1	GCNF	0	0	0	0	0	0	0	0	0	0	0	0	0	0	0	1	1	0	0	0	0	0	0	0	0	0	0	0	0	0	0	1	0	0	0	0	0	0	0	3
	Sum	22	19	22	24	24	23	22	21	23	22	18	7	19	19	16	18	19	20	19	18	27	20	21	10	12	24	15	16	18	18	12	24	20	20	22	17	8	22	17

## Sheet: CoexpressionMatrix_Mouse
	NR0B1	NR0B2	NR1A1	NR1A2	NR1B1	NR1B2	NR1B3	NR1C1	NR1C2	NR1C3	NR1D1	NR1D2	NR1F1	NR1F2	NR1F3	NR1H2	NR1H3	NR1H4	NR1I1	NR1I2	NR1I3	NR2A1	NR2A2	NR2B1	NR2B2	NR2B3	NR2C1	NR2C2	NR2E1	NR2E3	NR2F1	NR2F2	NR2F6	NR3A1	NR3A2	NR3B1	NR3B2	NR3B3	NR3C1	NR3C2	NR3C3	NR3C4	NR4A1	NR4A2	NR4A3	NR5A1	NR5A2	NR6A1
NR0B1	2		2		2	1	2		1		2	2	1		2	2	1	1						2	2	1					1	2	2	1	1	2	1		2	2	1	2	1			2	1	1
NR0B2
NR1A1	2		37		35	9	29	4	32	5	21	17	18	6	32	37	16	9	9			6	7	37	37	20				1	20	31	35	11	1	35	7	13	36	33	15	12	8	10	6	3	5	3
NR1A2
NR1B1	2		35		37	9	28	5	32	5	21	17	19	6	31	37	18	10	9			7	7	37	37	22				1	19	33	34	11	1	36	7	13	37	33	15	12	8	10	5	4	6	3
NR1B2	1		9		9	9	9	3	8	1	9	7	6	3	6	9	6	1	1			1	1	9	9	8					5	9	9	3		9	3	6	9	9	5	4	5	4	3	1		1
NR1B3	2		29		28	9	29	4	27	5	19	14	16	6	25	29	12	6	5			3	4	29	29	18				1	18	28	29	11	1	28	6	11	29	27	12	12	8	8	5	3	3	1
NR1C1			4		5	3	4	5	5	2	3	2	3		5	5	4	2	2			2	1	5	5	3					1	5	5	1		5	2	3	5	5	1	2					1
NR1C2	1		32		32	8	27	5	33	5	19	15	17	6	29	33	15	10	8			7	7	33	33	19				1	18	29	32	11	1	32	6	12	33	30	13	11	6	8	6	2	6	2
NR1C3			5		5	1	5	2	5	5	2		2		5	5	3	2	2			1	2	5	5	2					2	5	5	2		5		2	5	5		1		1			1
NR1D1	2		21		21	9	19	3	19	2	21	15	15	6	17	21	11	4	1			2	2	21	21	16				1	15	21	21	7	1	21	6	12	21	21	11	7	7	8	5	3	2	1
NR1D2	2		17		17	7	14	2	15		15	17	13	5	13	17	5	2	1			1	1	17	17	13				1	12	16	16	4	1	17	6	11	17	16	10	6	5	6	4	2	1	1
NR1F1	1		18		19	6	16	3	17	2	15	13	19	5	15	19	7	2	4			2	1	19	19	16				1	12	19	19	5		18	6	10	19	19	9	6	6	6	4	1	1	1
NR1F2			6		6	3	6		6		6	5	5	6	3	6	1							6	6	6				1	6	6	6	1		6	2	5	6	6	5	1	2	4	2
NR1F3	2		32		31	6	25	5	29	5	17	13	15	3	33	33	17	10	8			7	7	33	33	17				1	16	28	32	11	1	31	7	9	32	30	11	12	5	6	3	3	6	3
NR1H2	2		37		37	9	29	5	33	5	21	17	19	6	33	39	18	10	9			7	7	39	39	22				1	20	33	36	11	1	37	7	13	38	34	15	12	8	10	6	4	6	3
NR1H3	1		16		18	6	12	4	15	3	11	5	7	1	17	18	18	8	5			7	6	18	18	9					6	16	17	5		18	4	4	18	17	5	5	5	4	2	3	5	3
NR1H4	1		9		10	1	6	2	10	2	4	2	2		10	10	8	10	5			7	7	10	10	1					3	8	10	1	1	10	1	2	10	10	2	3	1	2	1	2	6	2
NR1I1			9		9	1	5	2	8	2	1	1	4		8	9	5	5	9			5	5	9	9	2					1	6	8	1		8	2	1	9	8	1	3					3	2
NR1I2
NR1I3
NR2A1			6		7	1	3	2	7	1	2	1	2		7	7	7	7	5			7	6	7	7	1						5	7			7	1	1	7	7	1	1					5	2
NR2A2			7		7	1	4	1	7	2	2	1	1		7	7	6	7	5			6	7	7	7						1	5	7			7	1	2	7	7	1	1		1			4	2
NR2B1	2		37		37	9	29	5	33	5	21	17	19	6	33	39	18	10	9			7	7	39	39	22				1	20	33	36	11	1	37	7	13	38	34	15	12	8	10	6	4	6	3
NR2B2	2		37		37	9	29	5	33	5	21	17	19	6	33	39	18	10	9			7	7	39	39	22				1	20	33	36	11	1	37	7	13	38	34	15	12	8	10	6	4	6	3
NR2B3	1		20		22	8	18	3	19	2	16	13	16	6	17	22	9	1	2			1		22	22	22				1	14	21	20	8		21	5	10	22	20	10	6	6	6	3	2	1	1
NR2C1
NR2C2
NR2E1
NR2E3			1		1		1		1		1	1	1	1	1	1								1	1	1				1	1	1	1			1	1	1	1	1
NR2F1	1		20		19	5	18	1	18	2	15	12	12	6	16	20	6	3	1				1	20	20	14				1	20	19	20	5	1	20	5	11	20	19	11	5	5	10	6	2	1
NR2F2	2		31		33	9	28	5	29	5	21	16	19	6	28	33	16	8	6			5	5	33	33	21				1	19	33	32	11	1	32	7	13	33	31	14	12	8	10	5	4	5	2
NR2F6	2		35		34	9	29	5	32	5	21	16	19	6	32	36	17	10	8			7	7	36	36	20				1	20	32	36	11	1	34	7	13	35	34	14	12	8	10	6	3	6	3
NR3A1	1		11		11	3	11	1	11	2	7	4	5	1	11	11	5	1	1					11	11	8					5	11	11	11	1	10		1	11	10	5	8	2	1		1	1
NR3A2	1		1		1		1		1		1	1			1	1		1						1	1						1	1	1	1	1	1			1	1	1	1				1	1
NR3B1	2		35		36	9	28	5	32	5	21	17	18	6	31	37	18	10	8			7	7	37	37	21				1	20	32	34	10	1	37	7	13	37	32	15	11	8	10	6	4	6	3
NR3B2	1		7		7	3	6	2	6		6	6	6	2	7	7	4	1	2			1	1	7	7	5				1	5	7	7			7	7	5	7	7	3	2	1	1	1	1		1
NR3B3			13		13	6	11	3	12	2	12	11	10	5	9	13	4	2	1			1	2	13	13	10				1	11	13	13	1		13	5	13	13	13	8	1	3	7	4
NR3C1	2		36		37	9	29	5	33	5	21	17	19	6	32	38	18	10	9			7	7	38	38	22				1	20	33	35	11	1	37	7	13	38	33	15	12	8	10	6	4	6	3
NR3C2	2		33		33	9	27	5	30	5	21	16	19	6	30	34	17	10	8			7	7	34	34	20				1	19	31	34	10	1	32	7	13	33	34	13	11	8	10	5	3	6	3
NR3C3	1		15		15	5	12	1	13		11	10	9	5	11	15	5	2	1			1	1	15	15	10					11	14	14	5	1	15	3	8	15	13	15	5	5	8	4	1	1
NR3C4	2		12		12	4	12	2	11	1	7	6	6	1	12	12	5	3	3			1	1	12	12	6					5	12	12	8	1	11	2	1	12	11	5	12	3	2	1	3	1	1
NR4A1	1		8		8	5	8		6		7	5	6	2	5	8	5	1						8	8	6					5	8	8	2		8	1	3	8	8	5	3	8	5	4	2		1
NR4A2			10		10	4	8		8	1	8	6	6	4	6	10	4	2					1	10	10	6					10	10	10	1		10	1	7	10	10	8	2	5	10	5	1
NR4A3			6		5	3	5		6		5	4	4	2	3	6	2	1						6	6	3					6	5	6			6	1	4	6	5	4	1	4	5	6	1
NR5A1	2		3		4	1	3		2		3	2	1		3	4	3	2						4	4	2					2	4	3	1	1	4	1		4	3	1	3	2	1	1	4	1	1
NR5A2	1		5		6		3	1	6	1	2	1	1		6	6	5	6	3			5	4	6	6	1					1	5	6	1	1	6			6	6	1	1				1	6	2
NR6A1	1		3		3	1	1		2		1	1	1		3	3	3	2	2			2	2	3	3	1						2	3			3	1		3	3		1	1			1	2	3
